1  
2  
3  
4  
5  
6  
7  
8  
9  
10  
11  
12  
13  
14  
15  
16  
17  
18  
19  
20  
21  
22  
23

**Intestine-to-neuronal signaling alters risk-taking behaviors in food-deprived**  
*Caenorhabditis elegans*

Molly A. Matty<sup>1†</sup>, Hiu E. Lau<sup>1,2†</sup>, Anupama Singh<sup>1,3</sup>, Jessica A. Haley<sup>1,4</sup>, Ahana Chakraborty<sup>1</sup>,  
Karina Kono<sup>1</sup>, Kirthi C. Reddy<sup>1</sup>, Malene Hansen<sup>3</sup>, and Sreekanth H. Chalasani<sup>1\*</sup>

<sup>1</sup> Molecular Neurobiology Laboratory, The Salk Institute for Biological Studies, La Jolla, CA 92037, USA.

<sup>2</sup> Division of Biological Sciences, University of California, San Diego, La Jolla, CA 92093, USA.

<sup>3</sup> Development, Aging and Regeneration Program, Sanford Burnham Prebys Medical Discovery Institute, La Jolla, CA 92037, USA.

<sup>4</sup> Neurosciences Graduate Program, University of California, San Diego, La Jolla, CA 92093, USA.

\*Author for correspondence: [schalasani@salk.edu](mailto:schalasani@salk.edu) (S.H.C.).

† *These authors contributed equally to this project*

24

25 **Long Title: Intestine-to-neuronal signaling alters risk-taking behaviors in food-deprived**

26 *Caenorhabditis elegans*

27 **Short Title: Food deprivation alters behavior**

28

29 **Author Summary**

30 We have all experienced behavioral changes when we are hungry - the pang in our stomach can  
31 cause us to behave erratically. In particular, hungry animals, including humans, are known to  
32 pursue behaviors that involve higher risk compared to when they are well-fed. Here we explore  
33 the molecular details of this behavior in the invertebrate animal model *C. elegans*. This behavior,  
34 termed sensory integration, shows that *C. elegans* display reduced copper sensitivity when  
35 hungry. Copper is toxic and repellant to *C. elegans*; reduced avoidance indicates that these  
36 animals use riskier food search behaviors when they are hungry. Luckily, like us, this behavioral  
37 change is reversible upon re-feeding. This hunger-induced behavioral change is not due to  
38 increased attraction to food or depletion of fat stores, but rather insulin signaling between the  
39 intestine and specific neurons. We use genetic tools, microscopy, and behavioral tests to  
40 determine that this risky behavior involves sensation of “lack of food” in the intestine, release of  
41 signaling molecules, and engagement with sensory neurons. Our work highlights new and  
42 potentially evolutionarily conserved ways in which intestinal cells and neurons communicate  
43 leading to largescale behavioral change, providing further support for the importance of the gut-  
44 brain-axis.

45

46 **Abstract**

47 Animals integrate changes in external and internal environments to generate behavior. While  
48 neural circuits detecting external cues have been mapped, less is known about how internal states  
49 like hunger are integrated into behavioral outputs. We use the nematode *C. elegans* to decode  
50 how changes in internal nutritional status affects chemosensory behaviors. We show that acute  
51 food deprivation leads to a reversible decline in repellent, but not attractant, sensitivity. This  
52 behavioral change requires two conserved transcription factors MML-1 (Mondo A) and HLH-30  
53 (TFEB), both of which translocate from the intestinal nuclei to the cytoplasm upon food  
54 deprivation. Next, we identify insulin-like peptides INS-23 and INS-31 as candidate ligands  
55 relaying food-status signals from the intestine to other tissues. Furthermore, we show that ASI  
56 chemosensory neurons use the DAF-2 insulin receptor, PI-3 Kinase, and the mTOR complex to  
57 integrate these intestine-released peptides. Together, our study shows how internal food status  
58 signals are integrated by transcription factors and intestine-neuron signaling to generate flexible  
59 behaviors.

60

## 61 **Keywords**

62 Behavioral plasticity; sensory integration; food-deprivation, MML-1, HLH-30, insulin-like  
63 peptides, DAF-2 receptors, ASI neurons, gut-brain axis.

64

## 65 **Introduction**

66 Animals evaluate their environment, integrating prior experiences and internal state  
67 information to optimize their behaviors in order to maximize rewards and avoid threats [1].  
68 Moreover, changes in internal states play a critical role in adjusting the animal's responses to  
69 external stimuli [2, 3]. One critical internal state is hunger, which has a profound effect on

70 animal survival and elicits dramatic changes in food-seeking behaviors [2, 4]. Multiple species,  
71 including humans, have been shown to alter their chemosensory behavior during periods of  
72 starvation [5-10]. Despite this, less is known about how the nervous system integrates  
73 information about hunger status.

74

75 The nematode *Caenorhabditis elegans*, with just 302 neurons [11], and 20 cells in its  
76 intestine [12], provides a unique opportunity for a high-resolution analysis of how the nervous  
77 system integrates internal signals. Previous studies have shown that *C. elegans*, similar to  
78 mammals, exhibits a number of behavioral, physiological, and metabolic changes in response to  
79 altered nutritional status. *C. elegans* hermaphrodites retain eggs [13], are unlikely to mate with  
80 males [14], initiate altered foraging behaviors [15-17], and change their responses to  
81 environmental CO<sub>2</sub> [18], salt [19], and pheromones [20] upon food deprivation. Moreover, many  
82 molecules that signal hunger are conserved between *C. elegans* and vertebrates. For example,  
83 neuropeptide Y (NPY) signaling influences feeding behaviors in nematodes and mammals [21-  
84 23]. Similar effects are also seen with insulin and dopamine signaling, which seem to act via  
85 modifying chemosensory activity and behavior in nematodes [24, 25]; and on mammalian neural  
86 circuits [26-28] to modify feeding behavior. While neuronal pathways responding to food-  
87 deprivation on the multiple-minute timescales have been mapped [17, 29], those integrating these  
88 signals on the multiple hour timescales are poorly understood.

89

90 Here we use *C. elegans* to dissect the machinery required to integrate internal food  
91 signals and modify behaviors. We combined food deprivation over multiple hours with a  
92 behavioral assay that quantifies the animal's ability to integrate both toxic and food-related

93 signals, mimicking a simplified ecologically relevant scenario. In this sensory integration assay,  
94 animals cross a toxic copper barrier (repellent) and chemotax towards a point source of a volatile  
95 food-associated odor, diacetyl (attractant) [30]. We show that animals' food-deprived for  
96 multiple hours have reduced sensitivity to the repellent and cross the copper barrier more readily  
97 than well-fed animals. Next, we show that two transcription factors translocate from the  
98 intestinal nuclei to the cytoplasm upon multiple hours of food deprivation. We confirm a role for  
99 these transcription factors and identify the downstream peptides released by the intestine to relay  
100 "the lack of food" signal to other tissues. Finally, we show that ASI chemosensory neurons  
101 integrate these intestine-released peptides. This allows animals to reduce their avoidance to  
102 repellents and undertake a higher risk strategy in their search for food.

103

## 104 **Results**

### 105 **Acute food deprivation specifically alters repellent-driven behaviors**

106 Animals simultaneously integrate both attractant and repellent signals from their  
107 environment to generate appropriate behavioral readouts. To mimic these interactions, animals  
108 are exposed to a copper repellent barrier ( $\text{CuSO}_4$ ) and a gradient of a volatile attractant, diacetyl  
109 [30]. The proportion of animals that cross the copper barrier are counted and expressed as a  
110 chemotactic index (**Figure 1A**). We analyzed the behavior of well-fed, wild-type animals and  
111 found that ~30% crossed the copper barrier and locomote towards the spot of diacetyl (black  
112 bars, **Figure 1B and Movie S1**). In contrast, food-deprived animals were more likely to cross the  
113 copper barrier (blue bars, **Figure 1B and Movie S2**). We also found that animals needed to be  
114 food deprived for at least 1 hr before they significantly altered their behavior with a maximal  
115 effect at 3 hrs (**Figure 1B**). Next, we tested whether the food-deprivation effect was reversible.

116 We food-deprived animals for 3 hrs and then returned them to food for different durations and  
117 analyzed animal behavior after the food experience. We found that 3-hr food-deprived animals  
118 that had been returned to food for at least 3 hrs reverted to the “well-fed” state (**Figure 1B**).  
119 Taken together, these results indicate that food deprivation reversibly modifies sensory  
120 integration behavior.

121  
122 We then tested whether this food deprivation-evoked change in sensory integration  
123 behavior was specific to the copper repellent and diacetyl attractant used in the assay. We  
124 observed that food-deprived animals did not cross the repellent barrier when diacetyl was paired  
125 with other repellents like fructose (except one intermediate concentration), sodium chloride, or  
126 quinine (**Figure 1C**). In contrast when copper was paired other attractants like benzaldehyde and  
127 isoamyl alcohol, food deprived animals continued to cross the copper barrier more readily than  
128 well-fed animals (**Figure 1D**). Next, we tested responses of these animals to varying  
129 concentrations of copper or diacetyl alone. We found that food-deprived animals crossed the  
130 copper barrier more readily than well-fed animals, suggesting that their responsiveness to copper  
131 is reduced even in the absence of an attractant (**Figure 1E**). In contrast, food-deprived animals  
132 did not discernably alter their attraction to diacetyl in the absence of the copper repellent (**Figure**  
133 **1F**). Given the small number of well-fed animals that cross the copper barrier alone (**Figure 1E**),  
134 we continued to pair copper with the diacetyl attractant for further analysis. We also tested  
135 whether altering the concentrations of the copper barrier has an effect on food-deprived animals  
136 and confirmed these concentrations using a copper indicator (**Supplementary Figure 1**). We  
137 found that food-deprived animals showed significant increase in their ability to cross the  
138 repellent barrier above a threshold of 5 mM copper concentration (**Figure 1G**). To gain further

139 confirmation of this copper-specific change, we tested food-deprived animals in a single animal  
140 copper drop assay (**Supplementary Figure 2A**). In this assay, the response of a single animal to  
141 a drop of 1.5 mM CuSO<sub>4</sub> solution placed in its path was monitored. Most repellents can be tested  
142 in this assay with animals generating a robust avoidance response [31]. We found that food-  
143 deprived animals showed a significant deficit in their copper avoidance response  
144 (**Supplementary Figure 2B**). Collectively, these data show that food-deprived animals display  
145 reduced sensitivity to copper, which we dissected further using genetic methods and tracking  
146 software.

147

#### 148 **Dynamics of risky search strategies in food-deprived animals**

149 To analyze how food deprivation modifies animal behavior, we recorded and tracked  
150 populations of animals over 45 minutes in the sensory integration assay. Individual animal  
151 trajectories were identified and used for analysis (see Methods and **Supplementary Figure 3**).  
152 We found that fewer well-fed animals cross the repellent copper barrier (**Figure 2A**) as  
153 compared to food-deprived animals (**Figure 2B**) during the entire 45 min assay (example tracks  
154 for all groups in **Supplementary Figure 3 E-H**). To quantify this difference, we plotted the  
155 fraction of tracks that crossed the copper barrier as a function of time (**Figure 2C**). We found  
156 that food-deprived, wild-type animals were more likely to cross the barrier at all time points (15,  
157 30, and 45 mins) compared to well-fed animals. Thus, the differences between well-fed and  
158 food-deprived animals were not limited to specific time windows in the assay. To further assess  
159 the increased likelihood of food-deprived animals crossing the repellent barrier, we compared the  
160 probability of animal tracks being located at given distances from the barrier (**Figure 2D**,  
161 methods described in **Supplementary Figure 3A-C**). We found that food-deprived worms are

162 nearly twice as likely to reside within +/- 0.5 cm from the copper barrier while well-fed animals  
163 are more likely to be found 2.1 cm from the barrier, not far from where the animals were placed  
164 on the assay plate (**Figure 2D**, statistics summarized in **Supplementary Table 2**). These data  
165 suggest that well-fed animals reorient upon detection of the copper thereby increasing the  
166 likelihood of animals being located in regions well before the barrier. In contrast, food-deprived  
167 animals cross the barrier more frequently. To further dissect these behavioral differences, we  
168 quantified the mean velocity of worm tracks (**Figure 2E**). We find that well-fed animals move  
169 more slowly when physically closer to the copper barrier. Food-deprived worms are significantly  
170 slower at distances far from the copper barrier (2-3.5 cm), but then accelerate to speeds matching  
171 well-fed behavior as they approach the barrier before slowing down as they reach the barrier  
172 consistent with well-fed animals (**Figure 2E, Supplementary Table 2**).

173         When this assay is run in the absence of the attractant diacetyl, there is no significant  
174 difference in the probability of crossing the copper barrier between well-fed and food-deprived  
175 worms (**Figure 2F**), but this may be related to the low numbers of experiments we analyzed in  
176 this group. However, this is consistent with an increased chemotactic index of food-deprived  
177 worms across the copper barrier in the absence of an attractant at all time points  
178 (**Supplementary Figure 3D**). The probability of food-deprived animals locomoting close to the  
179 copper barrier is higher for 0.3 and 0.5 cm before the barrier (**Figure 2G, Supplementary Table**  
180 **2**) while the velocity of these worms as a function of distance to the barrier is distributed  
181 similarly to worms assayed with copper and diacetyl (**Figure 2H, Supplementary Table 2**).  
182 These data suggest that the increased likelihood of food-deprived animals to cross the copper  
183 barrier cannot be explained by a deficiency in copper sensation alone. Further, these data suggest



184 that food-deprived animals display similar locomotion dynamics to well-fed animals in response  
185 to copper in the absence of diacetyl.

186 In the absence of copper, food-deprived and well-fed animals behave similarly with no  
187 significant difference in the fraction of “barrier” (no copper) crossings toward the diacetyl or  
188 their localization on the assay plate (**Figure 2I, 2J, Supplementary Table 2**). Further, food-  
189 deprived worms display a decreased velocity on average (**Figure 2K, Supplementary Table 2**),  
190 consistent with previous studies [32]. Collectively, these data suggest that increase in food-  
191 deprived animals crossing the copper barrier is not due increased mobility, but may rather be a  
192 result of these animals pursuing navigation that is unfavorable (copper is toxic to *C. elegans*  
193 [33]).

194

### 195 **Lack of food and not changes in fat drives the food-deprivation induced behavioral change**

196 Given that the change in sensory integration behavior requires multiple hours of food-  
197 deprivation, we hypothesized that metabolic signals like changes in fat content might play a  
198 crucial role. Additionally, previous studies have shown that prolonged starvation can deplete fat  
199 stores in *C. elegans*, which in turn can affect behavior [34, 35]. We tested whether 3 hrs of food  
200 deprivation alters the fat content of animals. Oil-Red O (ORO), a fat-soluble dye that stains  
201 triglycerides and lipoproteins has been used to label and quantify fat stores in *C. elegans* (**Figure**  
202 **3A-B**) [36]. We used this dye and found that 3 hrs of food-deprivation did not alter the ORO  
203 signal or the area of the animal labeled by this stain (**Figure 3C-D**). In contrast, we observed a  
204 significant change in the both the intensity of the signal and area of animal stained in 6-hr food-  
205 deprived animals, consistent with previous studies [37]. These data suggest that changes in

206 sensory integration behavior, which occurs after 3 hrs of food-deprivation is likely to be  
207 independent of fat metabolism.

208

209 Next, we sought to identify the relevant aspects of the bacterial experience contribute to  
210 the food deprivation-triggered behavioral change. *C. elegans* has been shown to evaluate  
211 multiple aspects of the food experience, including changes in food distribution, oxygen and  
212 carbon dioxide concentrations, small molecule metabolites and others [38-40]. To uncouple the  
213 tactile and chemosensory input of the bacteria from the nutritional value of ingesting bacteria, we  
214 analyzed the effect of using Sephadex gel beads on animal behavior. Animals exposed to gel  
215 beads experience the tactile input, but are not exposed to the nutritional value of food (**Figure**  
216 **3E**) [15]. Notably, we found that animals exposed o Sephadex beads in the absence of *E. coli*  
217 OP50 for 3 hrs behaved the same as food-deprived animals in the sensory integration assay  
218 (**Figure 3F**). Together, these results show that the lack of food in the *C. elegans* intestine, but not  
219 the absence of chemosensory cues, reduces the animal's sensitivity to copper.

220

### 221 **Transcription factors mediate food deprivation-induced behavioral change**

222 Our studies indicated that the lack of food inside the animal was responsible for the transient  
223 reduction in copper sensitivity. To gain insights into the underlying molecular machinery, we  
224 investigated the role of nutritional-responsive transcription factors in the sensory integration  
225 assay. In mammalian cells, glucose is rapidly converted to glucose-6-phosphate, whose levels  
226 are sensed by a two basic-helix-loop-helix-leucine zipper transcription factors, MondoA and  
227 ChREBP (Carbohydrate Response Element Binding Protein). In well-fed conditions, MondoA  
228 binds the excess glucose-6-phosphate and Mlx (Max-like protein X) and translocates to the

229 nucleus where it activates transcription of glucose-responsive genes. In the absence of glucose,  
230 MondoA remains in the cytoplasm [41, 42] (**Figure 4A**). *C. elegans* orthologs of MondoA and  
231 Mlx have been identified as MML-1 and MXL-2, respectively [43]. Furthermore, MML-  
232 1/MondoA has also been shown to translocate into the intestinal nuclei under well-fed conditions  
233 (**Figure 4A**) [44]. We predicted that *mml-1* mutants would be unable to sense the lack of food  
234 and thereby unable to reduce copper sensitivity after food deprivation. Consistently, we found  
235 that *mml-1*, but not *mxl-2* mutants were defective in their integration responses after food  
236 deprivation (**Figure 4B**). We then tested whether food deprivation alters the sub-cellular  
237 localization of the MML-1 protein. We monitored the GFP fluorescence under well-fed and  
238 food-deprived conditions in a *mml-1* knockout transgenic animal expressing GFP fused to the  
239 full-length coding sequence of MML-1/MondoA under well-fed and food-deprived conditions.  
240 We found that 3 hrs of food-deprivation resulted in an increased translocalization of MML-  
241 1/MondoA from the nucleus to the cytoplasm of the intestinal cells (**Figure 4C, 4D**). We suggest  
242 that this cytosolic MML-1/MondoA reduces copper sensitivity by modifying signaling between  
243 tissues.

244

245 Previous studies have shown that MML-1 regulates the activity and nuclear localization  
246 of a second bHLH transcription factor HLH-30 (*C. elegans* TFEB, **Figure 4A**) [45]. In multiple  
247 animal models, HLH-30 functions as a key regulator of longevity pathways by promoting  
248 autophagy and lysosome biogenesis [46-49]. We tested whether HLH-30/TFEB was also  
249 required for food deprivation-evoked change in sensory integration. We found that, unlike wild-  
250 type animals, *hll-30* null mutants did not show a change in their behavior after food-deprivation  
251 in the sensory integration assay (**Figure 4E**). We then tested whether the subcellular localization

252 of HLH-30/TFEB was also affected by food deprivation. We observed an initial decrease in  
253 cytosolic GFP fluorescence at 1 hr of food-deprivation in HLH-30::GFP transgenic animals  
254 (Lapierre et al., 2011). Subsequently, at 3 hr of food-deprivation we found a robust increase in  
255 cytosolic HLH-30::GFP fluorescence (**Figure 4F, 4G**). Collectively, these data show that both  
256 MML-1 and HLH-30 accumulate in the intestinal cytoplasm upon 3 hr of food-deprivation and  
257 are required for the consequent behavioral change in sensory integration.

258

### 259 **Intestine-to-neuron signaling involves insulin signaling**

260 Previous studies have shown that the *C. elegans* intestine is a major site for the transcriptional  
261 regulation of insulin-like peptide genes in response to starvation [50]. In addition, HLH-  
262 30/TFEB has been shown to act upstream of the insulin-signaling pathway in regulating the  
263 expression of neuronal chemoreceptor genes [51]. The *C. elegans* genome encodes about 40  
264 insulin-like peptides [52] and all of these ligands are thought to bind and signal via a single  
265 tyrosine kinase DAF-2 receptor [53]. We hypothesized that insulin-like peptides might also act  
266 downstream of HLH-30/TFEB in relaying food status signals from the intestine to other tissues.  
267 Consistent with our hypothesis, multiple insulin-like peptides including INS-3, INS-4, INS-6,  
268 INS-10, INS-17, INS-18, INS-23, and INS-31 contain HLH-30/TFEB binding sites in their  
269 promoters [51]. In addition, INS-7, INS-8 and INS-37 have been shown to affect the subcellular  
270 localization of HLH-30/TFEB in the *C. elegans* intestine after mating (**Figure 5A**). [54]. We  
271 tested mutants in these insulin-like peptide genes for their ability to alter their sensory integration  
272 behavior after food deprivation. We similarly tested animals with a semi-dominant mutation in  
273 *daf-28(sa191)*, since this allele has been shown to prevent other insulin-like peptides from  
274 binding the common DAF-2 insulin receptor [55-57]. We found that multiple insulin-like

275 peptides including INS-23 (*tm1875*), INS-31 (*tm3543*) and DAF-28 (*sa191*) were unable to  
276 respond to food deprivation. Specifically, these mutant animals did not display an increased  
277 ability to cross the repellent copper barrier when food deprived (**Figure 5B**), implying that these  
278 might be candidate signals relaying food status signals. In contrast, *ins-7* (*tm2001*), *ins-8*  
279 (*tm4144*), and *ins-37* (*tm6061*) mutants were similar to wild-type animals in their ability to cross  
280 the copper barrier in both well-fed and food-deprived conditions (**Figure 5C**). Taken together,  
281 these data suggest that the intestine might release INS-23, INS-31 and DAF-28 (or other insulin-  
282 like peptides whose binding to the DAF-2 insulin receptor is blocked by DAF-28) to relay  
283 hunger information to other tissues.

284

285         Next, we probed the role of the insulin receptor, DAF-2, in affecting 3 hr-food  
286 deprivation evoked changes in sensory integration. Consistent with our analysis of mutants in  
287 various insulin-like peptide genes, we found that mutants in the insulin receptor, DAF-2, were  
288 also defective in their response to food deprivation (**Figure 5D**). To localize the site of DAF-2  
289 action, we analyzed the effect of rescuing this receptor in different tissues. We found that  
290 expressing *daf-2* under neuronal, but not intestine or pharyngeal muscle promoters [57] restored  
291 normal behavior to the *daf-2* mutants (**Figure 5D**). Taken together, these results suggest that  
292 neuronally expressed DAF-2 receptors might detect INS-23, INS-31, and other insulin-like  
293 peptides released from the intestine, particularly those hindered by DAF-28 binding.

294

295         We then sought to test whether the upstream MML-1/Mondo A and the downstream  
296 DAF-2 insulin receptor function in the same pathway. We generated an *daf-2,mml-1* double  
297 mutant, which did not show any additional defects in the 3 hr food-deprivation evoked change in

298 sensory integration when compared to either *mml-1* or *daf-2* single mutant (**Figure 5E**),  
299 suggesting that these two might function in the same pathway. We also found that expressing  
300 MML-1 in the intestine alone was not sufficient to restore wild-type behavior to the double  
301 mutant. In contrast, restoring MML-1 to the intestine and DAF-2 in ASI sensory neurons  
302 restored normal integration response after food deprivation (**Figure 5E**). Together, these data  
303 show that while MML-1 is required in the intestine, DAF-2 is required in ASI neurons and these  
304 genes act in the same pathway to alter food deprivation-modulated integration behavior (**Figure**  
305 **5F**).

306

### 307 **ASI chemosensory neurons use insulin-signaling pathways to integrate intestine-released** 308 **peptide signals**

309 We then sought to identify components of the DAF-2 signaling pathway (**Figure 6A**) in ASI  
310 chemosensory neurons that were required to alter food-deprivation evoked change in sensory  
311 integration. We observed that mutants in the insulin-signaling pathway components including the  
312 FOXO family transcription factor *daf-16*, serine/threonine kinases AKT-1, AKT-2 (*akt-1*, *akt-2*),  
313 3-phosphoinositide-dependent kinase 1 (*pdk-1*) and lipid phosphatase (*daf-18*, PTEN suppressor)  
314 performed normally in the sensory integration assay after food deprivation (**Figure 6B**) [58, 59].  
315 In contrast, mutants in the phosphoinositide 3-kinase (PI3K, *age-1*) and Rictor (*rict-1*) [a key  
316 component of the mTORC2 complex [60, 61]] were defective in their copper sensitivity after  
317 food deprivation (**Figure 6B and 6C**). Similar to our *daf-2* rescue experiments, we found that  
318 Rictor was also required in ASI neurons to restore normal food-deprivation behavior to *rict-1*  
319 mutants (**Figure 6C**). These results suggest that PI-3 Kinase and Rictor might function in the  
320 same pathway downstream of DAF-2 receptors in ASI neurons. Previously, Rictor has been

321 shown to act in the intestine to mediate an intestine-to-neuron signaling to affect dauer formation  
322 [62]. Our results show that Rictor can also act in ASI neurons as part of an intestine-to-neuron  
323 signal to alter sensory integration behavior. Collectively, we suggest that food deprivation  
324 engages DAF-2 signaling in ASI chemosensory neurons to alter the animal's copper sensitivity  
325 allowing it to cross the copper barrier more readily.

326

## 327 **Discussion**

328 We used food deprivation in *C. elegans* as a model to understand how food deprivation modifies  
329 behavior. We show that food-deprived animals reversibly alter their behavior by reducing their  
330 repellent responsiveness, allowing them to traverse potentially toxic environments in their search  
331 for food. The *C. elegans* intestine sense the lack of food leading to cytosolic MML-1 and HLH-  
332 30, which in turn promotes the release of multiple insulins (INS-23, INS-31 and potentially  
333 others). These intestine-released peptides bind DAF-2 receptors and are processed by  
334 downstream PI-3 Kinase and RICT-1 in ASI and other neurons to reduce copper sensitivity and  
335 alter behavior (**Figure 6D**).

336

337 Multicellular animals' sense and regulate glucose homeostasis at several levels. While  
338 insulin and glucagon maintain constant levels of circulating glucose, the Myc-family  
339 transcription factors are used within cells. Glucose uses cell membrane-localized transporters to  
340 enter cells, where it is rapidly converted into glucose-6-phosphate [63]. This intermediate  
341 metabolite is sensed by the Myc-Max complex, which binds glucose-6-phosphate and  
342 translocates to the nucleus where it regulates the transcription of glucose-responsive genes [41].  
343 While the role of ChREBP/MondoA-Mlx-glucose-6-phosphate complex in regulating

344 transcription is well studied [42, 64, 65], the role of these proteins in the cytoplasm remains  
345 poorly understood. We show a specific role for MML-1 (MondoA homolog), but not MXL-2  
346 (Mlx homolog) in the intestine in reducing copper sensitivity after food deprivation.  
347 Additionally, we show that HLH-30, an ortholog of TFEB, is also required for attenuating  
348 copper sensitivity after food deprivation. Intriguingly, MML-1/MondoA and HLH-30/TFEB are  
349 both basic helix-loop-helix transcription factors and have been shown to act in concert to modify  
350 signaling networks and affecting global states like reproduction or survival [45]. Like MML-  
351 1/MondoA, a role for HLH-30/TFEB in the cytoplasm has also not been defined. We suggest  
352 that MML-1/MondoA and HLH-30/TFEB accumulation in the cytoplasm (in food deprived  
353 animals) enables the intestine to release peptide(s) relaying a “lack of glucose” signal to other  
354 tissues.

355  
356 Helix-loop-helix transcription factors in *C. elegans* like MML-1/MondoA and HLH-  
357 30/TFEB are known to bind similar E-box elements (CACGTG) and have large overlap in their  
358 target gene expression [43, 45]. Additionally, previous studies have identified multiple insulin-  
359 like peptide genes whose expression is regulated by HLH-30 and other insulin-like peptide  
360 genes, which can affect the subcellular localization of HLH-30 [51, 54]. We screened this subset  
361 of insulin-like peptide genes to identify multiple candidates relaying food status signals from the  
362 intestine to other tissues. The *C. elegans* intestine has been previously shown to be a key tissue  
363 where the transcription of insulin peptide genes is regulated [50]. While we have not directly  
364 demonstrated that our candidate insulin-like peptides are released from the intestine, we  
365 speculate that food deprivation promotes their release relaying the “lack of food” signal.

366



367 We show that the ASI chemosensory neurons use the tyrosine kinase insulin receptor  
368 (DAF-2) to integrate these signals. Three lines of evidence suggest that the intestine is releasing  
369 multiple insulin-like peptide(s) - first, mutants in *ins-23*, *ins-31* and *daf-28* are defective in their  
370 food-deprivation evoked change in behavior, second, the insulin receptor (DAF-2) integrates  
371 these signals and third, MML-1 is required in the intestine and acts in the same pathway as the  
372 DAF-2 receptor, which acts in ASI neurons. We also define additional insulin signaling pathway  
373 components in ASI neurons. While FOXO (DAF-16), AKT kinase -1 and -2, PDK-1 and PTEN  
374 (DAF-18) are not required, we show that AGE-1 (PI-3 Kinase) and Rictor (a component of the  
375 mTORC2 complex) are required to integrate intestine-released peptide signals. While PI-3 kinase  
376 has been shown to act via AKT kinase to activate the Rictor [60, 61], our result hint at an AKT  
377 kinase-independent mechanism for PI-3 Kinase to signal to Rictor and the mTORC2 complex.

378  
379 Multiple studies have also highlighted the role of insulin signaling in relaying starvation-  
380 related signals to various neurons. Starvation has been shown to decrease the secretion of INS-18  
381 from the intestine, which antagonizes DAF-2 receptor in ADL neurons and modifies pheromone-  
382 mediated behaviors [20]. Also, starvation has been shown to be associated with increased  
383 octopamine signaling, which transforms CO<sub>2</sub> attraction to repulsion in starved animals [18].  
384 Moreover, starvation has also been shown to recruit ASG neurons to cooperate with ASE  
385 neurons and drive avoidance to high salt [19]. We speculate that our intestine-to-neuron insulin  
386 signaling pathway leads to altered ASI function and altered copper sensitivity. Consistently,  
387 starvation has been shown to increase ASI neural activity in response to food-stimuli [66]. These  
388 data are also consistent with previous studies showing that ASI neurons playing a crucial role in  
389 modifying behavior after 6 hours of food deprivation [17, 67]. Taken together, we speculate that

390 food deprivation leads to an increase in insulin signaling from the intestine to ASI neurons,  
391 which alters neuronal activity and reduces the animal's sensitivity to copper, allowing it to cross  
392 the barrier more readily. More broadly, these studies link transcription factors and insulin  
393 signaling from the intestine to neurons to modify sensory behavior, a mechanism likely  
394 conserved across species.

395

## 396 **Methods**

397

### 398 **Strains**

399 *C. elegans* strains were grown and maintained under standard conditions [68]. All strains used  
400 are listed in **Supplementary Table 1**.

401

### 402 **Behavior Assays**

403 All animals were grown to adulthood on regular nematode growth medium (NGM) plates seeded  
404 with OP50 ( $OD_{600} \sim 0.2$ ) before they were washed and transferred to new food (standard NGM  
405 plates seeded with OP50) or food-free plates (standard NGM plates) respectively for the  
406 indicated duration. Sephadex beads (G-200) were added to both the empty NGM plate and the  
407 OP50 lawn in experiments for Figure 3E-F. Sensory integration assays were performed on 2%  
408 agar plates containing 5 mM potassium phosphate (pH 6), 1 mM  $CaCl_2$  and 1 mM  $MgSO_4$ , made  
409 the day before the experiment. Repellent gradients (including  $CuSO_4$  (Copper (II) sulfate  
410 pentahydrate, Sigma 209198), glycerol (, NaCl (, fructose (D-(-) Fructose Sigma F0127), and  
411 quinine (Sigma 22620)) were established by dripping 25  $\mu$ l of solution, dissolved in water,  
412 across the midline of the plate [30]. This solution was allowed to dry overnight. Prior to the

413 assay, the animals were washed from the food or food-free plates into Eppendorf tubes. Each  
414 treatment group was serially washed once with M9+MgSO<sub>4</sub> and 3 times with Chemotaxis buffer  
415 (5 mM potassium phosphate (pH 6, Fisher BP362 monobasic and Fisher BP363, dibasic), 1 mM  
416 CaCl<sub>2</sub> (Sigma C1016) and 1 mM MgSO<sub>4</sub> (Sigma M7506)) before being transferred to the assay  
417 plates. Glass Pasteur pipets were used to prevent loss of animals due to sticking in plastic pipette  
418 tips. Immediately after plating 100-200 animals in a small drop of chemotaxis buffer, 1  $\mu$ L of  
419 attractant with 1  $\mu$ L of 1M sodium azide in water (Sigma 71289) was placed on the opposite side  
420 of the chemotaxis plate. Attractants used were diacetyl (2,3-Butanedione Sigma 11038), Isoamyl  
421 alcohol (3-methyl-1-butanol, Sigma 77664), and Benzaldehyde (Sigma 418099) diluted in  
422 Ethanol. If necessary, the small drop of animals was dabbed gently with the edge of a Kim wipe  
423 and the lid was immediately replaced. After 45 minutes or at indicated times, the integration  
424 index was computed as the number of worms in the odor half of the plate divided by the total  
425 number of animals on the plate. For each experiment, at least two plates were tested each day  
426 with experiments performed on at least three different days. Unless otherwise noted, the repellent  
427 is a dried stripe of 25  $\mu$ L 50 mM CuSO<sub>4</sub> (Copper (II) sulfate pentahydrate, Sigma 209198) in  
428 water and the attractant is 1  $\mu$ L 0.2% diacetyl (2,3-Butanedione Sigma 11038) diluted 1:500 in  
429 100% ethanol.

430

### 431 **Statistics**

432 For sensory integration, experiments were performed at least 3 times with at least 2 plates per  
433 genotype/condition (unless otherwise noted). For strains with extrachromosomal arrays, only  
434 animals expressing the co-injection markers were counted. Every condition was performed with  
435 N2 (wild-type) controls at the same time. Two-way ANOVAs with post-hoc Bonferroni-

436 corrected multiple comparisons were performed across WF/FD conditions, only if the factor was  
437 significant. For all figures, p values are represented by: \*  $p < 0.05$ , \*\*  $p < 0.01$ , \*\*\*  $p < 0.001$ , \*\*\*\*  
438  $p < 0.0001$ .

439

#### 440 **Single animal avoidance assay: Copper drop test**

441 Experiments were performed as previously described [31]. Animals are moved from a food to a  
442 food-free assay plate. A capillary tube is used to deliver a drop of test compound (1.5 mM  
443  $\text{CuSO}_4$ ) 0.5 - 1 mm away from the head of the animal and its responses scored. Positive  
444 avoidance indicates an animal executing a large reversal and omega bend within 3 seconds of  
445 sensing the test compound. Five animals are tested per condition and with each animal exposed  
446 to 10 drops and the percent avoidance is plotted. Assay is replicated at least three times by an  
447 investigator who is blind to the conditions being tested.

448

449

#### 450 **Tracking**

451 Sensory integration behavior assays using 50 mM  $\text{CuSO}_4$  (Copper (II) sulfate pentahydrate,  
452 Sigma 209198) in water and 1  $\mu\text{L}$  0.2% diacetyl (2,3-Butanedione Sigma 11038) attractant  
453 (1:500 in 100% Ethanol) were performed with well-fed and food-deprived animals. Animal  
454 behavior was recorded for 45 minutes using a Pixelink camera (1024x1024 pixels at 3 frames per  
455 second). The imaging field of view was approximately 47 mm x 47 mm. WormLab software  
456 (MBF Bioscience) was used to identify and track the midpoints of worms in each video. Custom  
457 MATLAB software (<https://github.com/shreklab/Matty-et-al-2021>) was used to further clean the  
458 data (i.e. remove putative tracks that did not correspond to animal behavior) and analyze

459 individual tracks. Tracks were excluded if they met any of the following criteria: 1) overlapped  
460 with shadows or markings; 2) lasted less than 10 seconds; 3) travelled fewer than 30 pixels<sup>2</sup>; or  
461 4) traveled less than 10 pixels in any direction. Valid animal tracks were then plotted (**Figure**  
462 **2A, 2B**) and analyzed as described below.

463

#### 464 **Tracking analysis**

465 The number of animals in each experiment is estimated from the maximum number of  
466 simultaneous tracks identified in a single frame. An average of  $33.2 \pm 10.4$  animals were assayed  
467 across all conditions. Because the field of view does not encompass the entire plate, the number  
468 of tracks identified in each frame decreases over time as animals crawl to other regions of the  
469 plate. To quantify the number of animals crossing the copper barrier as a function of time, the  
470 number of unique tracks that started past the copper barrier was divided by the number of unique  
471 tracks in the entire field-of-view. This fraction of cumulative unique tracks that crossed the  
472 copper barrier was calculated for 15, 30, and 45 minutes (**Figure 2C, 2F, 2I; Supplementary**  
473 **Figure 3A**). To better understand animals' avoidance of copper and attraction to diacetyl, the  
474 probability of an animal residing at a particular distance from the barrier was calculated for 1  
475 mm bins. The total number of tracked midpoints at each time point located in each 1 mm bin was  
476 summed and divided by the total number of tracked midpoints across all bins (**Figure 2D, 2G,**  
477 **2J; Supplementary Figure 3C**). Additionally, animal velocity was calculated by computing the  
478 Euclidean distance of a track over a 2 second window. In each video, the average velocity of all  
479 tracks was computed as a function of distance from the copper barrier in 1 mm bins (**Figure 2E,**  
480 **2H, 2K; Supplementary Figure 3B**).

481

## 482 **Visualizing Copper Gradients**

483 Copper sulfate gradients were visualized using 1-(2-Pyridylazo)-2-naphthol (PAN, Sigma  
484 101036). Plates with 25  $\mu$ L of 5 mM, 25 mM, 50 mM and 100 mM  $\text{CuSO}_4$  dripped down the  
485 midline were dried overnight. 1 mL of 0.01% PAN indicator was added to plates the next day  
486 and allowed to dry. The plates with PAN indicator were incubated overnight and imaged the  
487 following day to allow for saturation of the signal. Images and quantification of the copper  
488 barrier is shown in **Supplementary Figure 1**.

489

## 490 **Fat quantification**

491 Oil red O staining was conducted as previously described [36]. Briefly, 10-20 N2 adults were  
492 allowed to lay eggs for 1 hour on NGM plates seeded with OP50. The adults were removed and  
493 eggs were allowed to develop for 3 days. These day-1 adult animals were either removed from  
494 food and placed on an empty NGM plate for 3 hours or 6 hours or placed on a new plate with  
495 OP50 food. 5 mg/mL Oil Red O (Sigma, O9755) in 100% isopropanol was prepared as a  
496 working solution and diluted 3:2 in 60% isopropanol on the day before use. Mixture was kept  
497 from the light and filtered using a 0.2  $\mu$ m cellulose acetate syringe filter and allowed to mix on a  
498 rocker overnight. Animals were washed off plates with PBST (PBS + 0.01% Triton X-100  
499 (Sigma, X100) at the appropriate times and washed once. Animals were fixed in 40% isopropanol  
500 and shaken at room temperature for 3 minutes. Isopropanol was removed and 600  $\mu$ L of the Oil  
501 Red O diluted solution was added to each tube. Each tube was nutated for 2 hours at room  
502 temperature, away from light. Animals were washed once with PBST and nutated for another 30  
503 minutes. Animals were washed once more and prepared for imaging. Approximately 20 worms  
504 from each treatment group were pipetted onto a microscope slide and covered with a coverslip.

505 Images were collected on upright Zeiss Axio Imager.M2 at 10X using an AxioCam 506 Color  
506 camera. Images were quantified using color deconvolution in ImageJ, normalized to background  
507 and an unstained region of an animal. Within each experiment, the same thresholds were used  
508 across treatments. Approximately 20 animals were quantified within each condition on each  
509 experimental day, performed across three different days.

510

### 511 **Imaging**

512 Transgenic animals (HLH-30::GFP and MML-1::GFP) were grown to day 1 adulthood (3 days  
513 post hatching) via a one-hour hatch off on standard NGM plates seeded with OP50. Animals  
514 were picked onto empty NGM plates for 1, 2, and 3 hours for food deprivation or placed on a  
515 new NGM plates with OP50. Animals were picked onto thin agar pads on microscope slides and  
516 anesthetized with 100  $\mu$ M tetramisole hydrochloride (Sigma-Aldrich L9756) immediately prior  
517 to imaging. Animals were imaged at 10X using an upright Zeiss Axio Imager .M2. At least 12  
518 animals per group on three different days were imaged and qualitatively analyzed for localization  
519 to primarily cytoplasmic, nuclear, or both in intestinal cells, with the investigator blind to food  
520 deprivation status.

521

### 522 **Molecular Biology and Transgenics**

523 The following primers were used for amplifying full-length cDNAs:

524 *mml-1*

525 forward 5' TATTTAGCTAGCATGTCGCGCGGGCAGATTATACACAG

526 reverse 5' CGGGGTACCGAGCAGTTCAAAATGGATTTTTGAGTTGTTGC

527 *rict-1*

528 forward 5'TATTTAGCTAGCATGGACACTCGTCGAAAAGTGTATCAC

529 reverse 5'CGGGGTACCTAAAAGATTTGCTGCAGGAATGCTCTCG

530 *daf-2*

531 forward 5' TATTTAGCTAGCAATGAATATTGTCAGATGTCGGAGACGA 3'

532 reverse 5' CGGGGTACCTCAGACAAGTGGATGATGCTCATTATC 3'

533 cDNAs corresponding to the entire coding sequences of *mml-1*, *rict-1*, and *daf-2* genomic region  
534 were amplified by PCR using primers above and expressed under tissue or cell selective  
535 promoters.

536 Tissue specific expression was achieved with *Prgef-1* for neurons, *Pges-1* and *Pgly-19* for the  
537 intestine, and *Pmyo-2* for pharynx, [69-74]. Cell-specific expression used *Pstr-3* was used for  
538 cell-specific expression in ASI neurons [75]. For all experiments, a splice leader (SL2) fused to  
539 *mCherry* or *gfp* transgene was used to confirm expression of the gene of interest in either specific  
540 cells or tissues. Germline transformations were performed by microinjection of plasmids [76] at  
541 concentrations between 50 and 100 ng/μl with 10 ng/μl of *elt-2::gfp* as a co-injection marker.

542

### 543 **Author Contributions**

544 M.A.M. and H.E.L. conceived and conducted the experiments, interpreted the data, and co-wrote  
545 the paper. A.S., A.C., and K.K., conducted behavioral assays; A.S.' experiments were conducted  
546 in M.H.'s laboratory. J.A.H. analyzed tracking data. S.H.C. conceived the experiments,  
547 interpreted the data and co-wrote the paper. All co-authors provided feedback on the manuscript.

548

### 549 **Acknowledgements**

550 We thank A. Dillin, T. Ishihara, S. Lockery, A. Samuelson, E. Troemel, M. Zhen, the National



551 BioResource Project (NBRP, Japan) and Caenorhabditis Genetics Center (CGC) for strains; C.  
552 Bargmann, E. Hallem, M. Hilliard, A. van der Linden, P. McGrath, D. Pilgrim and P. Sengupta  
553 for constructs; S. Srinivasan and lab members for RNAi clones and help with Oil-Red O  
554 staining; and M. Tamés, Z. Liu, and C. Yang for technical help with behavioral and imaging  
555 studies. We are also grateful to Jing Wang, and members of the Chalasani lab for critical  
556 comments, advice, and insights. This work was funded by grants from The Rita Allen  
557 Foundation, The W.M. Keck Foundation and NIH R01MH096881 to S.H.C., NSF Postdoctoral  
558 Research Fellowships in Biology Program Under Grant No. 2011023 (M.A.M), Socrates  
559 Program (H.E.L. Award #NSF-742551) and Graduate Research Fellowship from NSF (H.E.L.,  
560 and J.A.H.).

561

## 562 **References**

- 563 1. Dugatkin LA. Principles of animal behavior: University of Chicago Press; 2020.
- 564 2. Sternson SM, Nicholas Betley J, Cao ZF. Neural circuits and motivational processes for  
565 hunger. *Curr Opin Neurobiol.* 2013;23(3):353-60. doi: 10.1016/j.conb.2013.04.006. PubMed  
566 PMID: 23648085; PubMed Central PMCID: PMC3948161.
- 567 3. Taghert PH, Nitabach MN. Peptide neuromodulation in invertebrate model systems.  
568 *Neuron.* 2012;76(1):82-97. doi: 10.1016/j.neuron.2012.08.035. PubMed PMID: 23040808;  
569 PubMed Central PMCID: PMC3466441.
- 570 4. Atasoy D, Betley JN, Su HH, Sternson SM. Deconstruction of a neural circuit for hunger.  
571 *Nature.* 2012;488(7410):172-7. doi: 10.1038/nature11270. PubMed PMID: 22801496; PubMed  
572 Central PMCID: PMC3416931.

- 573 5. Gillette R, Huang RC, Hatcher N, Moroz LL. Cost-benefit analysis potential in feeding  
574 behavior of a predatory snail by integration of hunger, taste, and pain. *Proc Natl Acad Sci U S A*.  
575 2000;97(7):3585-90. PubMed PMID: 10737805; PubMed Central PMCID: PMC16283.
- 576 6. Kawai K, Sugimoto K, Nakashima K, Miura H, Ninomiya Y. Leptin as a modulator of  
577 sweet taste sensitivities in mice. *Proc Natl Acad Sci U S A*. 2000;97(20):11044-9. doi:  
578 10.1073/pnas.190066697. PubMed PMID: 10995460; PubMed Central PMCID: PMC27145.
- 579 7. Sengupta P. The belly rules the nose: feeding state-dependent modulation of peripheral  
580 chemosensory responses. *Curr Opin Neurobiol*. 2013;23(1):68-75. doi:  
581 10.1016/j.conb.2012.08.001. PubMed PMID: 22939570; PubMed Central PMCID:  
582 PMC3524363.
- 583 8. Inagaki HK, Panse KM, Anderson DJ. Independent, reciprocal neuromodulatory control  
584 of sweet and bitter taste sensitivity during starvation in *Drosophila*. *Neuron*. 2014;84(4):806-20.  
585 doi: 10.1016/j.neuron.2014.09.032. PubMed PMID: 25451195; PubMed Central PMCID:  
586 PMC4365050.
- 587 9. Smeets PA, de Graaf C, Stafleu A, van Osch MJ, Nivelstein RA, van der Grond J. Effect  
588 of satiety on brain activation during chocolate tasting in men and women. *The American journal*  
589 *of clinical nutrition*. 2006;83(6):1297-305.
- 590 10. O'doherty J, Rolls ET, Francis S, Bowtell R, McGlone F, Kobal G, et al. Sensory-specific  
591 satiety-related olfactory activation of the human orbitofrontal cortex. *Neuroreport*.  
592 2000;11(2):399-403.
- 593 11. White JG, Southgate E, Thomson JN, Brenner S. The structure of the nervous system of  
594 the nematode *Caenorhabditis elegans*. *Philos Trans R Soc Lond B Biol Sci*. 1986;314(1165):1-  
595 340. PubMed PMID: 22462104.

- 596 12. McGhee JD. The *C. elegans* intestine. WormBook. 2007:1-36. Epub 2007/12/01. doi:  
597 10.1895/wormbook.1.133.1. PubMed PMID: 18050495.
- 598 13. Trent C, Tsuing N, Horvitz HR. Egg-laying defective mutants of the nematode  
599 *Caenorhabditis elegans*. Genetics. 1983;104(4):619-47. PubMed PMID: 11813735.
- 600 14. Lipton J, Kleemann G, Ghosh R, Lints R, Emmons SW. Mate searching in  
601 *Caenorhabditis elegans*: a genetic model for sex drive in a simple invertebrate. J Neurosci.  
602 2004;24(34):7427-34. PubMed PMID: 15329389.
- 603 15. Sawin ER, Ranganathan R, Horvitz HR. *C. elegans* locomotory rate is modulated by the  
604 environment through a dopaminergic pathway and by experience through a serotonergic  
605 pathway. Neuron. 2000;26(3):619-31. PubMed PMID: 10896158.
- 606 16. Hills T, Brockie PJ, Maricq AV. Dopamine and glutamate control area-restricted search  
607 behavior in *Caenorhabditis elegans*. J Neurosci. 2004;24(5):1217-25. Epub 2004/02/06. doi:  
608 10.1523/JNEUROSCI.1569-03.2004  
609 24/5/1217 [pii]. PubMed PMID: 14762140.
- 610 17. Gray JM, Hill JJ, Bargmann CI. A circuit for navigation in *Caenorhabditis elegans*. Proc  
611 Natl Acad Sci U S A. 2005;102(9):3184-91. PubMed PMID: 15689400.
- 612 18. Rengarajan S, Yankura KA, Guillermin ML, Fung W, Hallem EA. Feeding state sculpts a  
613 circuit for sensory valence in *Caenorhabditis elegans*. Proc Natl Acad Sci U S A.  
614 2019;116(5):1776-81. Epub 2019/01/18. doi: 10.1073/pnas.1807454116. PubMed PMID:  
615 30651312; PubMed Central PMCID: PMC6358703.
- 616 19. Jang MS, Toyoshima Y, Tomioka M, Kunitomo H, Iino Y. Multiple sensory neurons  
617 mediate starvation-dependent aversive navigation in *Caenorhabditis elegans*. Proc Natl Acad Sci

- 618 U S A. 2019;116(37):18673-83. Epub 2019/08/29. doi: 10.1073/pnas.1821716116. PubMed  
619 PMID: 31455735; PubMed Central PMCID: PMC6744849.
- 620 20. Ryu L, Cheon Y, Huh YH, Pyo S, Chinta S, Choi H, et al. Feeding state regulates  
621 pheromone-mediated avoidance behavior via the insulin signaling pathway in *Caenorhabditis*  
622 *elegans*. *EMBO J*. 2018;37(15). Epub 2018/06/22. doi: 10.15252/embj.201798402. PubMed  
623 PMID: 29925517; PubMed Central PMCID: PMC6068425.
- 624 21. Mercer RE, Chee MJ, Colmers WF. The role of NPY in hypothalamic mediated food  
625 intake. *Front Neuroendocrinol*. 2011;32(4):398-415. doi: 10.1016/j.yfrne.2011.06.001. PubMed  
626 PMID: 21726573.
- 627 22. Nassel DR, Wegener C. A comparative review of short and long neuropeptide F signaling  
628 in invertebrates: Any similarities to vertebrate neuropeptide Y signaling? *Peptides*.  
629 2011;32(6):1335-55. doi: 10.1016/j.peptides.2011.03.013. PubMed PMID: 21440021.
- 630 23. de Bono M, Bargmann CI. Natural variation in a neuropeptide Y receptor homolog  
631 modifies social behavior and food response in *C. elegans*. *Cell*. 1998;94(5):679-89. PubMed  
632 PMID: 9741632.
- 633 24. Chalasani SH, Kato S, Albrecht DR, Nakagawa T, Abbott LF, Bargmann CI.  
634 Neuropeptide feedback modifies odor-evoked dynamics in *Caenorhabditis elegans* olfactory  
635 neurons. *Nat Neurosci*. 2010;13(5):615-21. Epub 2010/04/07. doi: nn.2526 [pii]  
636 10.1038/nn.2526. PubMed PMID: 20364145; PubMed Central PMCID: PMC2937567.
- 637 25. Ezcurra M, Tanizawa Y, Swoboda P, Schafer WR. Food sensitizes *C. elegans* avoidance  
638 behaviours through acute dopamine signalling. *Embo J*. 2011;30(6):1110-22. Epub 2011/02/10.  
639 doi: emboj201122 [pii]  
640 10.1038/emboj.2011.22. PubMed PMID: 21304491; PubMed Central PMCID: PMC3061029.

- 641 26. Air EL, Benoit SC, Clegg DJ, Seeley RJ, Woods SC. Insulin and leptin combine  
642 additively to reduce food intake and body weight in rats. *Endocrinology*. 2002;143(6):2449-52.  
643 doi: 10.1210/endo.143.6.8948. PubMed PMID: 12021212.
- 644 27. Berthoud HR. Metabolic and hedonic drives in the neural control of appetite: who is the  
645 boss? *Curr Opin Neurobiol*. 2011;21(6):888-96. doi: 10.1016/j.conb.2011.09.004. PubMed  
646 PMID: 21981809; PubMed Central PMCID: PMC3254791.
- 647 28. Figlewicz DP, Sipols AJ. Energy regulatory signals and food reward. *Pharmacol*  
648 *Biochem Behav*. 2010;97(1):15-24. doi: 10.1016/j.pbb.2010.03.002. PubMed PMID: 20230849;  
649 PubMed Central PMCID: PMC2897918.
- 650 29. Chalasani SH, Chronis N, Tsunozaki M, Gray JM, Ramot D, Goodman MB, et al.  
651 Dissecting a circuit for olfactory behaviour in *Caenorhabditis elegans*. *Nature*.  
652 2007;450(7166):63-70. Epub 2007/11/02. doi: nature06292 [pii]  
653 10.1038/nature06292. PubMed PMID: 17972877.
- 654 30. Ishihara T, Iino Y, Mohri A, Mori I, Gengyo-Ando K, Mitani S, et al. HEN-1, a secretory  
655 protein with an LDL receptor motif, regulates sensory integration and learning in *Caenorhabditis*  
656 *elegans*. *Cell*. 2002;109(5):639-49. Epub 2002/06/14. doi: S0092867402007481 [pii]. PubMed  
657 PMID: 12062106.
- 658 31. Hilliard MA, Bargmann CI, Bazzicalupo P. *C. elegans* responds to chemical repellents by  
659 integrating sensory inputs from the head and the tail. *Curr Biol*. 2002;12(9):730-4. PubMed  
660 PMID: 12007416.
- 661 32. Lüersen K, Faust U, Gottschling D-C, Döring F. Gait-specific adaptation of locomotor  
662 activity in response to dietary restriction in *Caenorhabditis elegans*. *Journal of Experimental*  
663 *Biology*. 2014;217(14):2480-8. doi: 10.1242/jeb.099382.

- 664 33. Williams PL, Dusenbery DB. A promising indicator of neurobehavioral toxicity using the  
665 nematode *Caenorhabditis elegans* and computer tracking. *Toxicol Ind Health*. 1990;6(3-4):425-  
666 40. PubMed PMID: 2237928.
- 667 34. Hyun M, Davis K, Lee I, Kim J, Dumur C, You Y-J. Fat metabolism regulates satiety  
668 behavior in *C. elegans*. *Scientific reports*. 2016;6(1):1-9.
- 669 35. Lemieux GA, Ashrafi K. Investigating connections between metabolism, longevity, and  
670 behavior in *Caenorhabditis elegans*. *Trends in Endocrinology & Metabolism*. 2016;27(8):586-96.
- 671 36. Escorcía W, Ruter DL, Nhan J, Curran SP. Quantification of lipid abundance and  
672 evaluation of lipid distribution in *Caenorhabditis elegans* by Nile red and Oil Red O staining.  
673 *Journal of Visualized Experiments: JoVE*. 2018;(133).
- 674 37. Srinivasan S, Sadegh L, Elle IC, Christensen AG, Faergeman NJ, Ashrafi K. Serotonin  
675 regulates *C. elegans* fat and feeding through independent molecular mechanisms. *Cell Metab*.  
676 2008;7(6):533-44. Epub 2008/06/05. doi: S1550-4131(08)00144-7 [pii]  
677 10.1016/j.cmet.2008.04.012. PubMed PMID: 18522834; PubMed Central PMCID:  
678 PMC2495008.
- 679 38. Calhoun AJ, Tong A, Pokala N, Fitzpatrick JA, Sharpee TO, Chalasani SH. Neural  
680 Mechanisms for Evaluating Environmental Variability in *Caenorhabditis elegans*. *Neuron*.  
681 2015;86(2):428-41. doi: 10.1016/j.neuron.2015.03.026. PubMed PMID: 25864633; PubMed  
682 Central PMCID: PMC4409562.
- 683 39. Carrillo MA, Hallem EA. Gas sensing in nematodes. *Mol Neurobiol*. 2015;51(3):919-31.  
684 doi: 10.1007/s12035-014-8748-z. PubMed PMID: 24906953.

- 685 40. Ludewig AH, Schroeder FC. Ascaroside signaling in *C. elegans*. *WormBook*. 2013:1-22.  
686 Epub 2013/01/29. doi: 10.1895/wormbook.1.155.1. PubMed PMID: 23355522; PubMed Central  
687 PMCID: PMC3758900.
- 688 41. Havula E, Hietakangas V. Glucose sensing by ChREBP/MondoA-Mlx transcription  
689 factors. *Semin Cell Dev Biol*. 2012;23(6):640-7. doi: 10.1016/j.semcdb.2012.02.007. PubMed  
690 PMID: 22406740.
- 691 42. Stoltzman CA, Peterson CW, Breen KT, Muoio DM, Billin AN, Ayer DE. Glucose  
692 sensing by MondoA: Mlx complexes: a role for hexokinases and direct regulation of thioredoxin-  
693 interacting protein expression. *Proc Natl Acad Sci U S A*. 2008;105(19):6912-7. doi:  
694 10.1073/pnas.0712199105. PubMed PMID: 18458340; PubMed Central PMCID: PMC2383952.
- 695 43. Grove CA, De Masi F, Barrasa MI, Newburger DE, Alkema MJ, Bulyk ML, et al. A  
696 multiparameter network reveals extensive divergence between *C. elegans* bHLH transcription  
697 factors. *Cell*. 2009;138(2):314-27. doi: 10.1016/j.cell.2009.04.058. PubMed PMID: 19632181;  
698 PubMed Central PMCID: PMC2774807.
- 699 44. Johnson DW, Llop JR, Farrell SF, Yuan J, Stolzenburg LR, Samuelson AV. The  
700 *Caenorhabditis elegans* Myc-Mondo/Mad complexes integrate diverse longevity signals. *PLoS*  
701 *Genet*. 2014;10(4):e1004278. doi: 10.1371/journal.pgen.1004278. PubMed PMID: 24699255;  
702 PubMed Central PMCID: PMC3974684.
- 703 45. Nakamura S, Karalay Ö, Jäger PS, Horikawa M, Klein C, Nakamura K, et al. Mondo  
704 complexes regulate TFEB via TOR inhibition to promote longevity in response to gonadal  
705 signals. *Nature communications*. 2016;7(1):1-15.
- 706 46. Lapierre LR, Gelino S, Melendez A, Hansen M. Autophagy and lipid metabolism  
707 coordinately modulate life span in germline-less *C. elegans*. *Curr Biol*. 2011;21(18):1507-14.

- 708 doi: 10.1016/j.cub.2011.07.042. PubMed PMID: 21906946; PubMed Central PMCID:  
709 PMC3191188.
- 710 47. Pyo J-O, Yoo S-M, Ahn H-H, Nah J, Hong S-H, Kam T-I, et al. Overexpression of Atg5  
711 in mice activates autophagy and extends lifespan. *Nature communications*. 2013;4(1):1-9.
- 712 48. Settembre C, Di Malta C, Polito VA, Aencibia MG, Vetrini F, Erdin S, et al. TFEB links  
713 autophagy to lysosomal biogenesis. *science*. 2011;332(6036):1429-33.
- 714 49. O'Rourke EJ, Ruvkun G. MXL-3 and HLH-30 transcriptionally link lipolysis and  
715 autophagy to nutrient availability. *Nature cell biology*. 2013;15(6):668-76.
- 716 50. Chen Y, Baugh LR. Ins-4 and daf-28 function redundantly to regulate *C. elegans* L1  
717 arrest. *Developmental biology*. 2014;394(2):314-26.
- 718 51. Gruner M, Grubbs J, McDonagh A, Valdes D, Winbush A, van der Linden AM. Cell-  
719 Autonomous and Non-Cell-Autonomous Regulation of a Feeding State-Dependent  
720 Chemoreceptor Gene via MEF-2 and bHLH Transcription Factors. *PLoS Genet*.  
721 2016;12(8):e1006237. Epub 2016/08/04. doi: 10.1371/journal.pgen.1006237. PubMed PMID:  
722 27487365; PubMed Central PMCID: PMC4972359.
- 723 52. Hobert O. The neuronal genome of *Caenorhabditis elegans*. *WormBook*. 2013:1-106. doi:  
724 10.1895/wormbook.1.161.1. PubMed PMID: 24081909.
- 725 53. Pierce SB, Costa M, Wisotzkey R, Devadhar S, Homburger SA, Buchman AR, et al.  
726 Regulation of DAF-2 receptor signaling by human insulin and ins-1, a member of the unusually  
727 large and diverse *C. elegans* insulin gene family. *Genes Dev*. 2001;15(6):672-86. PubMed  
728 PMID: 11274053.
- 729 54. Shi C, Booth LN, Murphy CT. Insulin-like peptides and the mTOR-TFEB pathway  
730 protect *Caenorhabditis elegans* hermaphrodites from mating-induced death. *eLife*. 2019;8. Epub



- 731 2019/07/10. doi: 10.7554/eLife.46413. PubMed PMID: 31282862; PubMed Central PMCID:  
732 PMCPMC6697448.
- 733 55. Li W, Kennedy SG, Ruvkun G. daf-28 encodes a *C. elegans* insulin superfamily member  
734 that is regulated by environmental cues and acts in the DAF-2 signaling pathway. *Genes Dev.*  
735 2003;17(7):844-58. PubMed PMID: 12654727.
- 736 56. Gruner M, Nelson D, Winbush A, Hintz R, Ryu L, Chung SH, et al. Feeding state, insulin  
737 and NPR-1 modulate chemoreceptor gene expression via integration of sensory and circuit  
738 inputs. *PLoS genetics*. 2014;10(10):e1004707-e. doi: 10.1371/journal.pgen.1004707. PubMed  
739 PMID: 25357003.
- 740 57. Hung WL, Wang Y, Chitturi J, Zhen M. A *Caenorhabditis elegans* developmental  
741 decision requires insulin signaling-mediated neuron-intestine communication. *Development*.  
742 2014;141(8):1767-79. doi: 10.1242/dev.103846. PubMed PMID: 24671950; PubMed Central  
743 PMCID: PMC3978837.
- 744 58. Lapierre LR, Hansen M. Lessons from *C. elegans*: signaling pathways for longevity.  
745 *Trends Endocrinol Metab*. 2012;23(12):637-44. doi: 10.1016/j.tem.2012.07.007. PubMed PMID:  
746 22939742; PubMed Central PMCID: PMC3502657.
- 747 59. Murphy CT, Hu PJ. Insulin/insulin-like growth factor signaling in *C. elegans*.  
748 *WormBook*. 2013:1-43. doi: 10.1895/wormbook.1.164.1. PubMed PMID: 24395814.
- 749 60. Soukas AA, Kane EA, Carr CE, Melo JA, Ruvkun G. Rictor/TORC2 regulates fat  
750 metabolism, feeding, growth, and life span in *Caenorhabditis elegans*. *Genes Dev.*  
751 2009;23(4):496-511. Epub 2009/02/26. doi: 10.1101/gad.1775409. PubMed PMID: 19240135; PubMed Central PMCID: PMC2648650.
- 752

- 753 61. Jones KT, Greer ER, Pearce D, Ashrafi K. Rictor/TORC2 regulates *Caenorhabditis*  
754 *elegans* fat storage, body size, and development through *sgk-1*. *PLoS Biol.* 2009;7(3):e60. Epub  
755 2009/03/06. doi: 08-PLBI-RA-3327 [pii]  
756 10.1371/journal.pbio.1000060. PubMed PMID: 19260765; PubMed Central PMCID:  
757 PMC2650726.
- 758 62. O'Donnell MP, Chao P-H, Kammenga JE, Sengupta P. Rictor/TORC2 mediates gut-to-  
759 brain signaling in the regulation of phenotypic plasticity in *C. elegans*. *PLoS genetics.*  
760 2018;14(2):e1007213.
- 761 63. Jordan SD, Konner AC, Bruning JC. Sensing the fuels: glucose and lipid signaling in the  
762 CNS controlling energy homeostasis. *Cell Mol Life Sci.* 2010;67(19):3255-73. Epub 2010/06/16.  
763 doi: 10.1007/s00018-010-0414-7. PubMed PMID: 20549539; PubMed Central PMCID:  
764 PMC2933848.
- 765 64. Stoeckman AK, Ma L, Towle HC. Mlx is the functional heteromeric partner of the  
766 carbohydrate response element-binding protein in glucose regulation of lipogenic enzyme genes.  
767 *J Biol Chem.* 2004;279(15):15662-9. doi: 10.1074/jbc.M311301200. PubMed PMID: 14742444.
- 768 65. Li MV, Chen W, Harmancey RN, Nuotio-Antar AM, Imamura M, Saha P, et al. Glucose-  
769 6-phosphate mediates activation of the carbohydrate responsive binding protein (ChREBP).  
770 *Biochem Biophys Res Commun.* 2010;395(3):395-400. doi: 10.1016/j.bbrc.2010.04.028.  
771 PubMed PMID: 20382127; PubMed Central PMCID: PMC2874883.
- 772 66. Davis KC, Choi Y-I, Kim J, You Y-J. Satiety behavior is regulated by ASI/ASH  
773 reciprocal antagonism. *Scientific reports.* 2018;8(1):1-7.
- 774 67. Shimizu K, Ashida K, Hotta K, Oka K. Food deprivation changes chemotaxis behavior in  
775 *Caenorhabditis elegans*. *Biophysics and physicobiology.* 2019;16:167-72.

- 776 68. Brenner S. The genetics of *Caenorhabditis elegans*. *Genetics*. 1974;77(1):71-94. PubMed  
777 PMID: 4366476.
- 778 69. Shioi G, Shoji M, Nakamura M, Ishihara T, Katsura I, Fujisawa H, et al. Mutations  
779 affecting nerve attachment of *Caenorhabditis elegans*. *Genetics*. 2001;157(4):1611-22. PubMed  
780 PMID: 11290717; PubMed Central PMCID: PMC1461592.
- 781 70. Okkema PG, Harrison SW, Plunger V, Aryana A, Fire A. Sequence requirements for  
782 myosin gene expression and regulation in *Caenorhabditis elegans*. *Genetics*. 1993;135(2):385-  
783 404. PubMed PMID: 8244003; PubMed Central PMCID: PMC1205644.
- 784 71. Warren CE, Krizus A, Dennis JW. Complementary expression patterns of six  
785 nonessential *Caenorhabditis elegans* core 2/I N-acetylglucosaminyltransferase homologues.  
786 *Glycobiology*. 2001;11(11):979-88. PubMed PMID: 11744632.
- 787 72. Hilliard MA, Bargmann CI. Wnt signals and frizzled activity orient anterior-posterior  
788 axon outgrowth in *C. elegans*. *Dev Cell*. 2006;10(3):379-90. PubMed PMID: 16516840.
- 789 73. Maduro M, Pilgrim D. Identification and cloning of *unc-119*, a gene expressed in the  
790 *Caenorhabditis elegans* nervous system. *Genetics*. 1995;141(3):977-88. PubMed PMID:  
791 8582641.
- 792 74. Egan CR, Chung MA, Allen FL, Heschl MFP, Van Buskirk CL, McGhee JD. A Gut-to-  
793 Pharynx/Tail Switch in Embryonic Expression of the *Caenorhabditis elegans* *ges-1* Gene Centers  
794 on Two GATA Sequences. *Developmental Biology*. 1995;170(2):397-419. doi:  
795 <https://doi.org/10.1006/dbio.1995.1225>.
- 796 75. Troemel ER, Chou JH, Dwyer ND, Colbert HA, Bargmann CI. Divergent seven  
797 transmembrane receptors are candidate chemosensory receptors in *C. elegans*. *Cell*.  
798 1995;83(2):207-18. PubMed PMID: 7585938.

799 76. Mello C, Fire A. DNA transformation. *Methods Cell Biol.* 1995;48:451-82.

800

801

## 802 **Main Figure Legends**

### 803 **Figure 1: Starvation reduces copper avoidance**

804 A) Schematic of the sensory integration assay. ~100-200 day 1 adult animals (n) are placed in  
805 the black rectangle. Blue barrier represents copper barrier (or other repellent) and star represents  
806 diacetyl or other attractant. Chemotactic Index is the number of animals that have crossed the  
807 barrier (odor side) divided by the total number of animals on the plate (odor + origin sides).  
808 Experiments with well-fed (WF) animals will appear with black dots and those with food-  
809 deprived (FD) animals will be indicated with blue dots. Unless otherwise noted, FD is 3 hours  
810 with no food. Each dot represents a single plate (N) of animals (n).

811 B) Animals are deprived of food for increasing periods of time. Animals that have been starved  
812 for 3 hours are allowed to recover for 1, 3, or 5 hours on OP50. Well-fed matched partners are  
813 kept on OP50 plates for the entire length of the experiment. Animals are exposed to 50 mM  
814  $\text{CuSO}_4$  repellent and 1:500 (0.2%) diacetyl attractant.  $N \geq 6$ .

815 C) Animals are exposed to increasing concentrations of other repellents (Fructose, NaCl,  
816 Quinine) with the attractant 0.05% diacetyl (1:2000) in each condition  $N \geq 7$ .

817 D) Animals are exposed to decreasing concentrations of diacetyl (0.2%, 0.1% and 0.05%, or  
818 1:200, 1:1000, and 1:2000, respectively) and other volatile attractants 0.1% Benzaldehyde (BZ)  
819 and 0.05% Isoamyl Alcohol (IAA). 50 mM  $\text{CuSO}_4$  is the repellent in each condition  $N \geq 6$ .

820 E) Animals are exposed to  $\text{CuSO}_4$  in increasing concentrations (5 mM, 25 mM, 50 mM, 100  
821 mM) without any attractant  $N \geq 8$ .

822 F) Animals are exposed to diacetyl alone in decreasing concentrations (0.2%, 0.1%, 0.05%). Full  
823 assay (0.2% diacetyl and 50 mM CuSO<sub>4</sub>) is included as a control N<sub>≥</sub>7.

824 G) Animals are exposed to 1:500 diacetyl and increasing concentrations of CuSO<sub>4</sub> (5 mM, 25  
825 mM, 50 mM, 100 mM) N<sub>≥</sub>6.

826 All graphs are analyzed using a two-way ANOVA, determined to have significant differences  
827 across well-fed and food-deprived conditions. WF/FD comparisons were then performed as  
828 pairwise comparisons within each genotype or treatment as t-tests with Bonferroni corrections  
829 for multiple comparisons. \* p<0.5, \*\* p<0.01, \*\*\* p<0.001, \*\*\*\* p<0.0001, ns p>0.05. Error  
830 bars are S.D.

831

## 832 **Figure 2: Riskier search strategies in starved worms**

833 (A) Worm tracks (n = 32) are plotted for a representative sensory integration assay of well-fed  
834 worms behaving in the presence of 50mM CuSO<sub>4</sub> (blue stripe) and 1 μL 0.2% diacetyl (1:500)  
835 (location not shown). Regions of the plate that were not able to be tracked are in gray with the  
836 edge of the plate indicated in black. Tracks are plotted and color coded for time (0 – 45 minutes).

837 (B) Worm tracks (n = 31) are plotted for a representative sensory integration assay of 3 hour  
838 food-deprived worms. Conditions and plotting the same as in A.

839 (C, F, I) The mean cumulative sum of worm tracks that cross the barrier as a fraction of the total  
840 worm tracks is plotted at three time points (15, 30, and 45 minutes). Well-fed (WF) animals  
841 appear with black dots and food-deprived (FD) animals are indicated with blue dots. Each dot  
842 represents a single plate of animals. C) 50 mM CuSO<sub>4</sub> and 0.2% diacetyl F) 50 mM CuSO<sub>4</sub>, no  
843 diacetyl I) No copper, 0.2% (1:500) diacetyl. Graphs are analyzed using a two-way ANOVA to  
844 determine significant differences across well-fed and food-deprived conditions. WF/FD

845 comparisons were then performed as pairwise comparisons within each time period as t-tests  
846 with Bonferroni corrections for multiple comparisons. \*  $p < 0.05$ , \*\*  $p < 0.01$ , \*\*\*  $p < 0.001$ , \*\*\*\*  
847  $p < 0.0001$ , ns  $p > 0.05$ .  
848 (D, G, J) The probability of an animal being located at 1 mm binned distances from the barrier is  
849 plotted for well-fed (black) and food-deprived animals (blue). The dark line represents the mean  
850 probability of residence with the shaded areas representing the standard error of the mean. D) 50  
851 mM CuSO<sub>4</sub> and 0.2% diacetyl G) 50 mM CuSO<sub>4</sub>, no diacetyl J) No copper, 0.2% diacetyl. For  
852 each graph, multiple unpaired t-tests with Welch's correction were performed with correction for  
853 multiple comparisons with Holm-Šídák post-hoc test. Corrected p values  $< 0.05$  are indicated by  
854 yellow shading. A comprehensive list of the statistics can be found in Supplementary Table 2.  
855 (E, H, K) The mean velocity of worms as a function of distance from the barrier is plotted for  
856 well-fed (black) and food-deprived animals (blue). Conditions, plotting, and statistics are the  
857 same as in D, G, and J.

858

### 859 **Figure 3: Lack of food, not fat or physical interactions, drive behavioral changes**

860 (A) Schematic of Oil Red O experiments. Animals are raised together to day 1 of adulthood and  
861 separated into three groups: well-fed (on food), 3 hour food-deprived, and 6 hour food-deprived.  
862 Animals are stained using Oil Red O and then imaged using a color camera. (B) Representative  
863 images of well-fed (WF, black), 3 hour food-deprived (3hr FD, blue), and 6 hour food-deprived  
864 (6hr FD, green). Inset images are shown, highlighting the regions where there is the most  
865 difference in staining. Black arrows highlight regions of no Oil Red O stain in 6hr FD. (C) Graph  
866 showing the percent change in Oil Red O staining when compared to the average of the area of  
867 Oil Red O signal above a threshold value in the well-fed group within each independent

868 experiment. N=3, n>20 within each experimental treatment group. (D) Graph showing the  
869 percent of the animals' area that contains Oil Red O signal above threshold N=3, n>20 within  
870 each experimental treatment group. Same data as in C, shown as non-normalized values. (E) A  
871 schematic representing the experiment in F, in which populations of animals are either well-fed  
872 or food-deprived in the presence or absence of Sephadex beads before performing the sensory  
873 integration assay. (F) Prior to the sensory integration assay, animals are exposed to either  
874 standard OP50 ("no beads WF") or empty plates ("no beads FD"), or Sephadex gel beads as  
875 chemosensory input. Alternatively, animals were exposed to beads and no food ("beads FD") or  
876 OP50 with Sephadex beads on top ("beads WF") for 3 hours. Animals were then exposed to  
877 standard Sensory Integration Assay set-up with 50 mM CuSO<sub>4</sub> and 1 μL of 0.2% diacetyl. N≥18.  
878 C and D were analyzed using Welch's ANOVA test with Dunnett's multiple comparisons test. \*  
879 p<0.5, \*\* p<0.01, \*\*\* p<0.001, \*\*\*\* p<0.0001, ns p>0.05. F was analyzed using a full model  
880 two-way ANOVA, determined to have significant differences across well-fed and food-deprived  
881 conditions but no difference between "bead"/"no bead" groups. Those comparisons are shown to  
882 indicate no difference between "beads" and "no beads". Pairwise comparisons within each  
883 treatment were performed as t-tests with Tukey's multiple comparisons test. Error bars are S.D.  
884

885 **Figure 4: *mml-1* and *hlh-30* are required for sensory integration shift upon food**  
886 **deprivation, correlated with shifts in intestinal localization.**

887 (A) Schematic showing the 20 intestinal cells in a day 1 adult *C. elegans*. Our findings for  
888 MML-1::GFP and HLH-30::GFP are shown in the dotted box, while previously published  
889 paradigms are within the solid line box. Addition of glucose has been shown to induce nuclear  
890 localization of MondoA. Autophagy has been shown to increase nuclear localization of HLH-30.

891 (B) Standard sensory integration assay with *mml-1(ok849)* and *mxl-2(tm1516)* and wildtype  
892 controls. N=20.

893 (C) Representative images of MML-1::GFP localization in day 1 adult animals (data quantified  
894 in D). All images were collected with the same exposure time and laser power.

895 (D) Intestinal MML-1::GFP expression in animals during static timepoints food deprivation.  
896 Only intestinal expression was characterized as “nuclear”, “nuclear/cytoplasmic”, or  
897 “cytoplasmic”. Each dot represents the proportion of animals within an experiment with the  
898 phenotype. N=6, n=296.

899 (E) Standard sensory integration assay with *hlh-30(tm1978)* mutant animals and wildtype  
900 controls. N=9.

901 (F) Representative images of HLH-30::GFP localization in day 1 adult animals (data quantified  
902 in G). All images were collected with the same exposure time and laser power.

903 (G) Intestinal HLH-30::GFP expression in animals during static timepoints of food deprivation.  
904 Only intestinal expression was characterized as “nuclear”, “nuclear/cytoplasmic”, or  
905 “cytoplasmic”. Each dot represents the proportion of animals within an experiment with the  
906 phenotype. N=3, n=149.

907 B and E were analyzed using two-way ANOVA, determined to have significant differences  
908 across well-fed and food-deprived conditions. WF/FD comparisons were then performed as  
909 pairwise comparisons within each genotype or treatment as t-tests with Bonferroni's multiple  
910 comparisons test. D and G were analyzed using Two-Way ANOVA, determined to have  
911 significant differences across localization and an interaction between time of food deprivation  
912 and localization. Within each localization group, pairwise comparisons were performed across



913 each time point and tested for significance using Tukey's multiple comparisons test. \*  $p < 0.05$ , \*\*  
914  $p < 0.01$ , \*\*\*  $p < 0.001$ , \*\*\*\*  $p < 0.0001$ , ns  $p > 0.05$ . Error bars are S.D.

915

916 **Figure 5: Sensory integration changes require HLH-30-regulated insulins and *daf-2* is**  
917 **required in neurons with *mml-1* in the intestine.**

918 (A) HLH-30 interacts with *C. elegans* insulin peptides. Of the 40 insulin-like peptides encoded in  
919 the *C. elegans* genome, 22% have an HLH-30 binding motif (CANNTG E-box, blue) in the 5'  
920 UTR (< 300bp upstream of start site) [51]. 7% of insulins have been shown to regulate the  
921 localization of HLH-30 but do not contain an E-box (orange, "HLH-30 modifiers"). An  
922 illustration of a representative insulin peptide with two yellow exons and an upstream E-box with  
923 HLH-30 initiating transcription.

924 (B) All insulins known to contain an HLH-30 binding motif in the 5' UTR were tested using the  
925 standard sensory integration assay. When available, more than one allele was tested ( $N \geq 8$ ) for  
926 each insulin, with wild-type (N2) animals tested with each mutant.

927 (C) Insulins previously shown to regulate HLH-30 localization (*ins-7*, *ins-8*, *ins-37*) were tested  
928 using the standard sensory integration assay alongside wildtype (N2) control.  $N \geq 7$ .

929 (D) *daf-2* mutants and tissue-specific rescues are tested in the standard sensory integration assay  
930  $N \geq 9$  for each strain tested alongside wild-type N2. *daf-2* is rescued in neurons, intestines, and  
931 pharynx using tissue-specific promoters.

932 (E) *daf-2*, *mml-1*, and *daf-2 mml-1* mutants were tested in standard sensory integration assays.  
933 *mml-1* was rescued in a tissue-specific manner in intestinal cells (*Pgly-19*) and *daf-2* was rescued  
934 in the ASI neurons (*Pstr-3*), alongside N2 controls.  $N \geq 10$ .

935 (F) Schematic showing requirement of *mml-1* in the intestine, insulin-like peptides, and *daf-2* in  
936 ASI neurons. CI phenotype means Chemotactic Index phenotype, where wildtype animals  
937 displace a chemotactic index of WF < FD.

938 All graphs were analyzed using a two-way ANOVA, determined to have significant differences  
939 across well-fed and food-deprived conditions. WF/FD comparisons were then performed as  
940 pairwise comparisons within each genotype or treatment as t-tests with Bonferroni's multiple  
941 comparisons test. \* p<0.5, \*\* p<0.01, \*\*\* p<0.001, \*\*\*\* p<0.0001, ns p>0.05.

942

943 **Figure 6: ASI chemosensory neurons use insulin-signaling pathway to integrate intestine-**  
944 **released peptide signals**

945 (A) Schematic of an ASI neuron's *daf-2*-mediated canonical and non-canonical insulin signaling.  
946 Summary of the findings in B and C.

947 (B) Standard sensory integration assay performed with mutants in the canonical insulin signaling  
948 pathway (*daf-16*, *age-1*, *daf-18*, *pdk-1*, *akt-1*, and *akt-2*), alongside wild-type N2 N $\geq$ 7.

949 (C) Standard sensory integration assay performed with wildtype N2 (*rict-1* +), *rict-1* mutants,  
950 and *rict-1* mutants with *rict-1* rescued in ASI (*Pstr-3*). N  $\geq$ 9.

951 (D) Summary of data and proposed model through which food deprivation alters animal  
952 behavior.

953 (B-C) were analyzed using two-way ANOVA, determined to have significant differences across  
954 well-fed and food-deprived conditions. WF/FD comparisons were then performed as pairwise  
955 comparisons within each genotype or treatment as t-tests with Bonferroni's multiple comparisons  
956 test. \* p<0.5, \*\* p<0.01, \*\*\* p<0.001, \*\*\*\* p<0.0001, ns p>0.05.

957 **Supplementary Material Legends**

958 **Supplementary Figure 1 (to accompany Figure 1): Spread of copper sulfate  $\text{CuSO}_4$  on agar**  
959 **plates visualized using 1-(2-pyridylazo)-2-naphthol**

960 (A-E) 25  $\mu\text{l}$  of (A) water as control, (B) 5 mM  $\text{CuSO}_4$ , (C) 25 mM  $\text{CuSO}_4$ , (D) 50 mM  $\text{CuSO}_4$ ,  
961 and (E) 100 mM  $\text{CuSO}_4$  was dripped and dried overnight along the midline of the plate to form a  
962 copper gradient. PAN indicator (1-(2-pyridylazo)-2-naphthol) distributed over the entire plate  
963 shows a gradient of orange-red upon chelation with copper ions. (F) Measured width of colored  
964 area with each data point representing the average width, error bars indicate SEM. N = 9.

965

966 **Supplementary Figure 2 (to accompany Figure 1): Food-deprived animals fail to avoid**  
967 **copper in single animal drop test.**

968 (A) Schematic for dry drop test shown in B. ~300 nL of 1.5 mM  $\text{CuSO}_4$  is dropped ~1 mm away  
969 from the animal's forward motion. Turning away or backing up is considered "avoidance" and  
970 given a score of 1. Heading toward the dried drop is considered "no avoidance" and given a  
971 score of 0. (B) Quantification of the dry drop test. Food-deprived (FD) animals were starved for  
972 3 hours. Each dot represents the average of ten trials (drops) for a single animal, N=15.

973 Analyzed with an unpaired t-test \*  $p < 0.05$ , \*\*  $p < 0.01$ , \*\*\*  $p < 0.001$ , \*\*\*\*  $p < 0.0001$ , ns  $p > 0.05$ .

974 Error bars are S.D.

975 **Supplementary Figure 3 (to accompany Figure 2): Description of measurements to define**  
976 **tracking dynamics and additional treatment groups**

977 (A) Measuring Barrier Crossings. Worm tracks ( $n = 31$ ) are plotted for the first 15 minutes of a  
978 representative sensory integration assay. 188 tracks are plotted in a unique color with the start of  
979 each track labelled with a numbered, circular marker. The number of unique, continuous tracks  
980 that started past the copper barrier was divided by the number of unique tracks in the entire field-  
981 of-view to obtain a measure of barrier crossing. In the example experiment shown, 11 unique  
982 tracks crossed the barrier out of 188 total tracks, resulting in a Barrier Crossings score of 0.0585  
983 for this experiment after 15 minutes of recording.

984 (B) Measuring Velocity. 10 seconds (i.e. 30 frames) of a single example worm track is plotted.  
985 The midpoint positions of the worm at each frame as identified by WormLab are plotted as filled  
986 circles connected by lines. For each time  $t$ , the velocity was calculated by computing the  
987 Euclidean distance of the track from time  $t - 1$  second to time  $t + 1$  second and dividing by the  
988 length of time, 2 seconds. Because these videos lack the special resolution necessary to  
989 accurately estimate absolute path length (and thus body bends), Euclidean distance is used. In the  
990 example given, the Euclidean distance of the 2 second time window centered at time  $t$  was 425.7  
991  $\mu\text{m}$  resulting in an instantaneous velocity of 212.9  $\mu\text{m/s}$ . Velocity was calculated for every time  
992 point in this way.

993 (C) Measuring Probability of Location. 9 unique worms tracks are plotted in a 3 mm x 3 mm  
994 field-of-view, a 9  $\text{mm}^2$  inset of a 45-minute example experiment. The midpoint positions of the  
995 worms at each frame are plotted as circles connected by lines. Midpoints located in Bin X (1 mm  
996 wide) are represented by filled circles while midpoints located in the neighboring bins (Bin X-1  
997 and Bin X+1, each 1 mm wide) are represented by open circles. The probability of a worm being

998 located in Bin X is calculated by dividing the number of tracked midpoints in Bin X by the total  
999 number of tracked points in all bins. In the small example area shown, there are 139 points in Bin  
1000 X and a total of 345 points across all 3 bins resulting in a p(Location) score of 0.4029. In the  
1001 entire field of view there are 45 bins, yielding an average p(Location) score of 0.0222. This  
1002 analysis was used in Figure 2D, 2G, 2J.

1003 (D) Graph of the chemotactic index (# animals on odor side / total # of animals) over time (15,  
1004 30, 45 minute bins). Well-fed (WF) animals appear with black dots and food-deprived (FD)  
1005 animals are indicated with blue dots. Each dot represents a single plate of animals, with each  
1006 plate measured at each time point (matched). Analyzed using a Two-Way ANOVA, determined  
1007 to have significant differences across well-fed and food-deprived conditions. WF/FD  
1008 comparisons were then performed as pairwise comparisons within each time period as t-tests  
1009 with Bonferroni's correction for multiple comparisons. \*  $p < 0.05$ , \*\*  $p < 0.01$ , \*\*\*  $p < 0.001$ , \*\*\*\*  
1010  $p < 0.0001$ , ns  $p > 0.05$ .

1011 (E) Worm tracks ( $n = 36$ ) are plotted for a representative sensory integration assay of well-fed  
1012 worms behaving in the presence of 50 mM  $\text{CuSO}_4$  in water (blue stripe) with no attractant  
1013 (location not shown). Regions of the plate that were not able to be tracked are in gray with the  
1014 edge of the plate indicated in black. Tracks are plotted and color coded for time.

1015 (F) Worm tracks ( $n = 40$ ) are plotted for a representative sensory integration assay of 3 hour  
1016 food-deprived worms. Conditions and plotting the same as in E.

1017 (G) Worm tracks ( $n = 33$ ) are plotted for a representative sensory integration assay of well-fed  
1018 worms behaving in the presence of no barrier (blue stripe) with attractant is 1  $\mu\text{L}$  0.2% diacetyl  
1019 (1:500) in 100% ethanol (location not shown). Regions of the plate that were not able to be

1020 tracked are in gray with the edge of the plate indicated in black. Tracks are plotted and color  
1021 coded for time.

1022 (H) Worm tracks (n = 31) are plotted for a representative sensory integration assay of 3 hour  
1023 food-deprived worms. Conditions and plotting the same as in G.

1024

1025 **Supplementary Table 1: All worm strains used in the experiments.** Strain ID,  
1026 genotype/allele, and how it is referenced in the paper is provided. If the strain is first described  
1027 here (all IV strains), the method of creation is provided.

1028

1029 **Supplementary Table 2: All p-values for figures 2D, 2G, 2J and 2E, 2H, 2K.** The p-values  
1030 shown are the result of multiple unpaired t-tests with Welch's correction with Holm-Šídák post-  
1031 hoc tests correction for multiple comparisons. Adjusted p-values are shown, with yellow shading  
1032 for adjusted p-values <0.05, same shading as in figures 2D, 2G, 2J and 2E, 2H, 2K.

1033

1034 **Supplemental Movie S1. Sensory integration behavior of well-fed animals.** ~150 Well-fed  
1035 wild-type animals are placed in the standard sensory integration assay. Bracket indicates origin  
1036 where animals are placed, spot shows position of 1:500 diacetyl odor, midline indicates repellent  
1037 CuSO<sub>4</sub> barrier.

1038

1039 **Supplemental Movie S2. Sensory integration behavior of food-deprived animals.** ~150  
1040 Wild-type animals' food-deprived for three hours are placed in sensory integration behavior  
1041 assay. Bracket indicates origin where animals are placed, spot shows position of 1:500 diacetyl  
1042 odor, midline indicates CuSO<sub>4</sub> barrier.

A

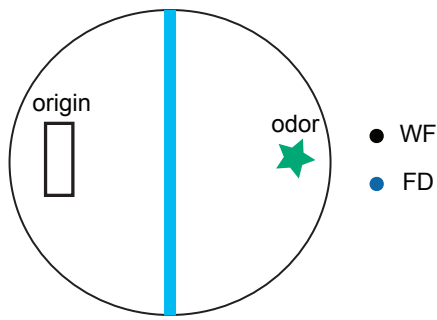

$$\text{Chemotactic Index} = \frac{\# \text{ worms odor half}}{\# \text{ worms origin half} + \# \text{ worms odor half}}$$

B

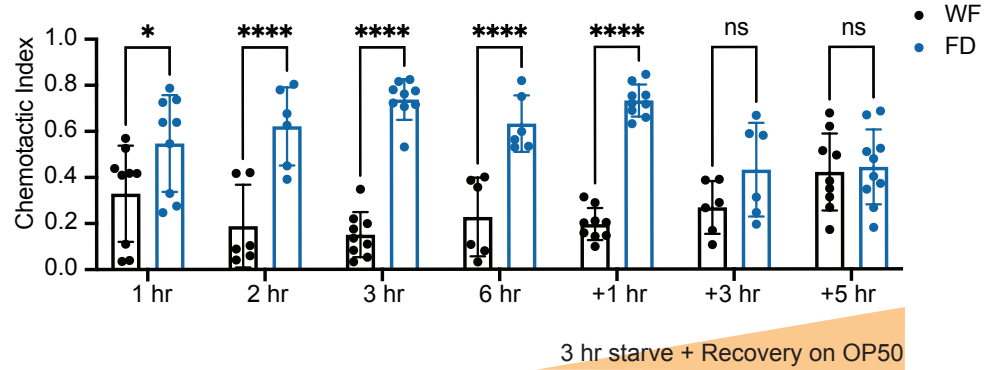

C

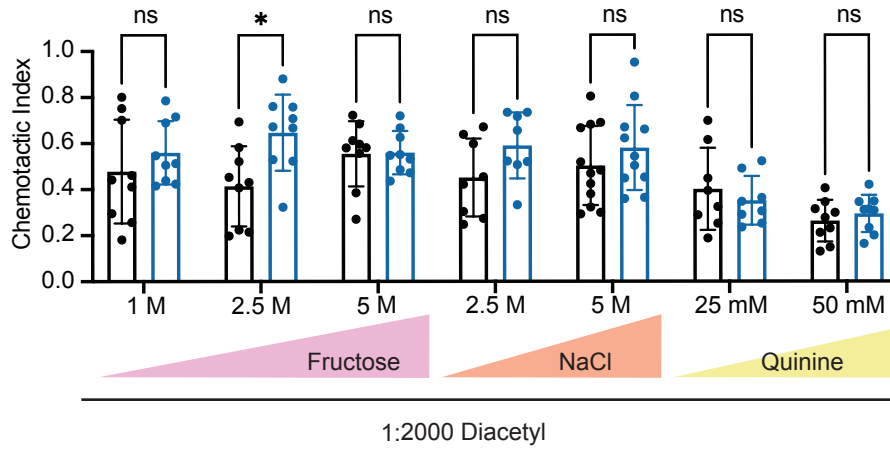

D

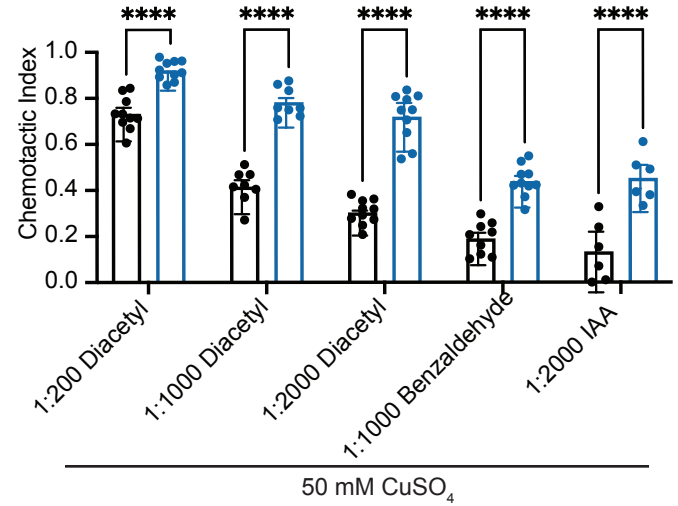

E

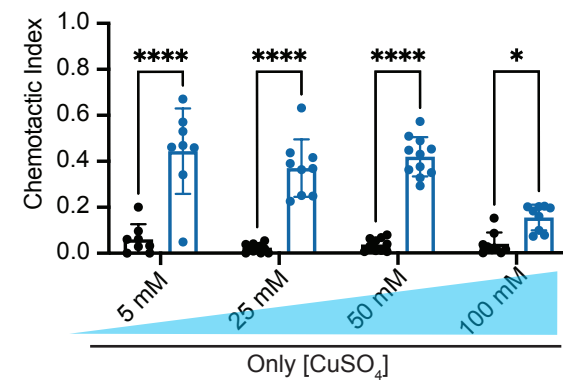

F

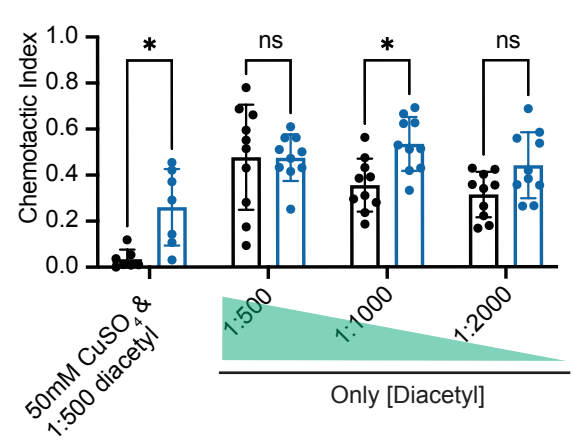

G

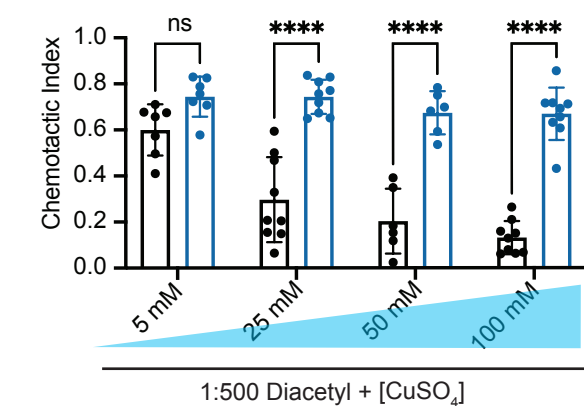

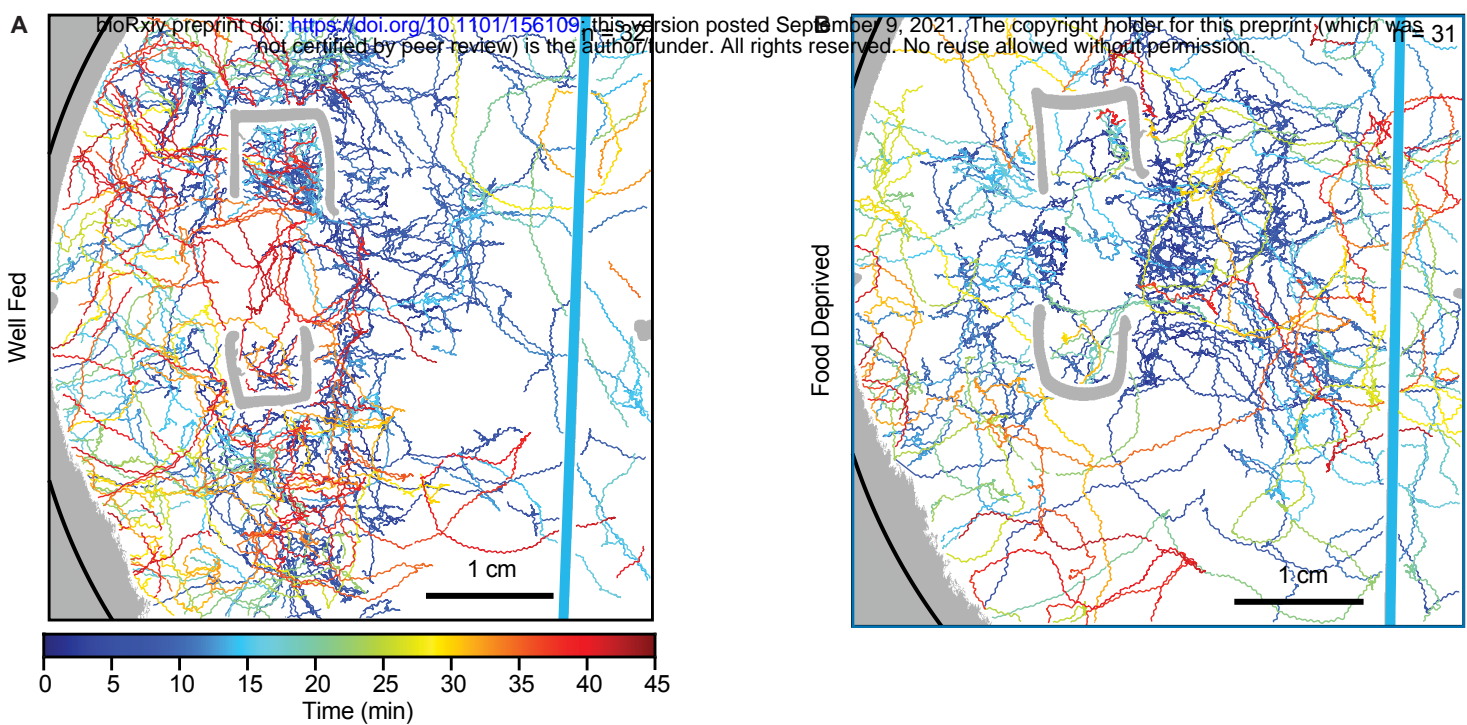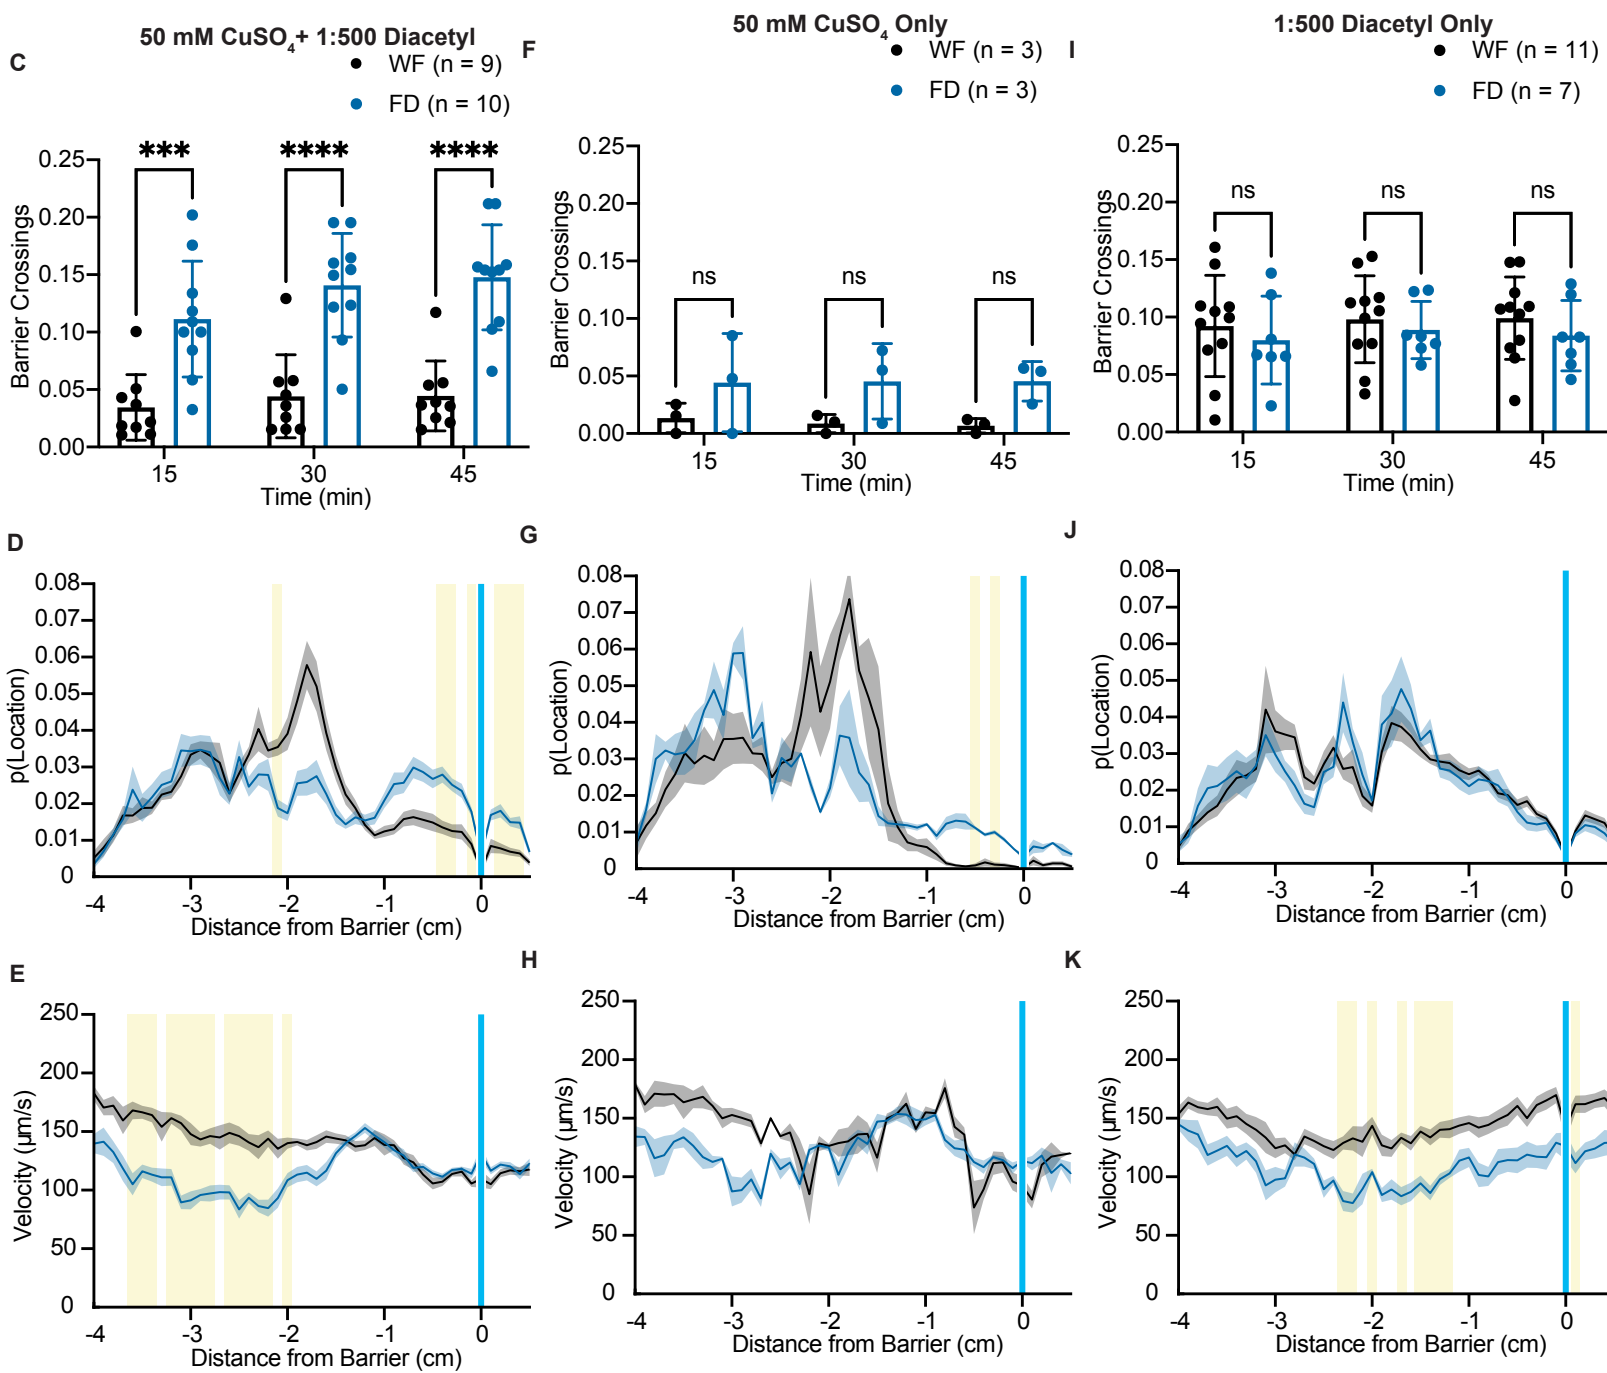



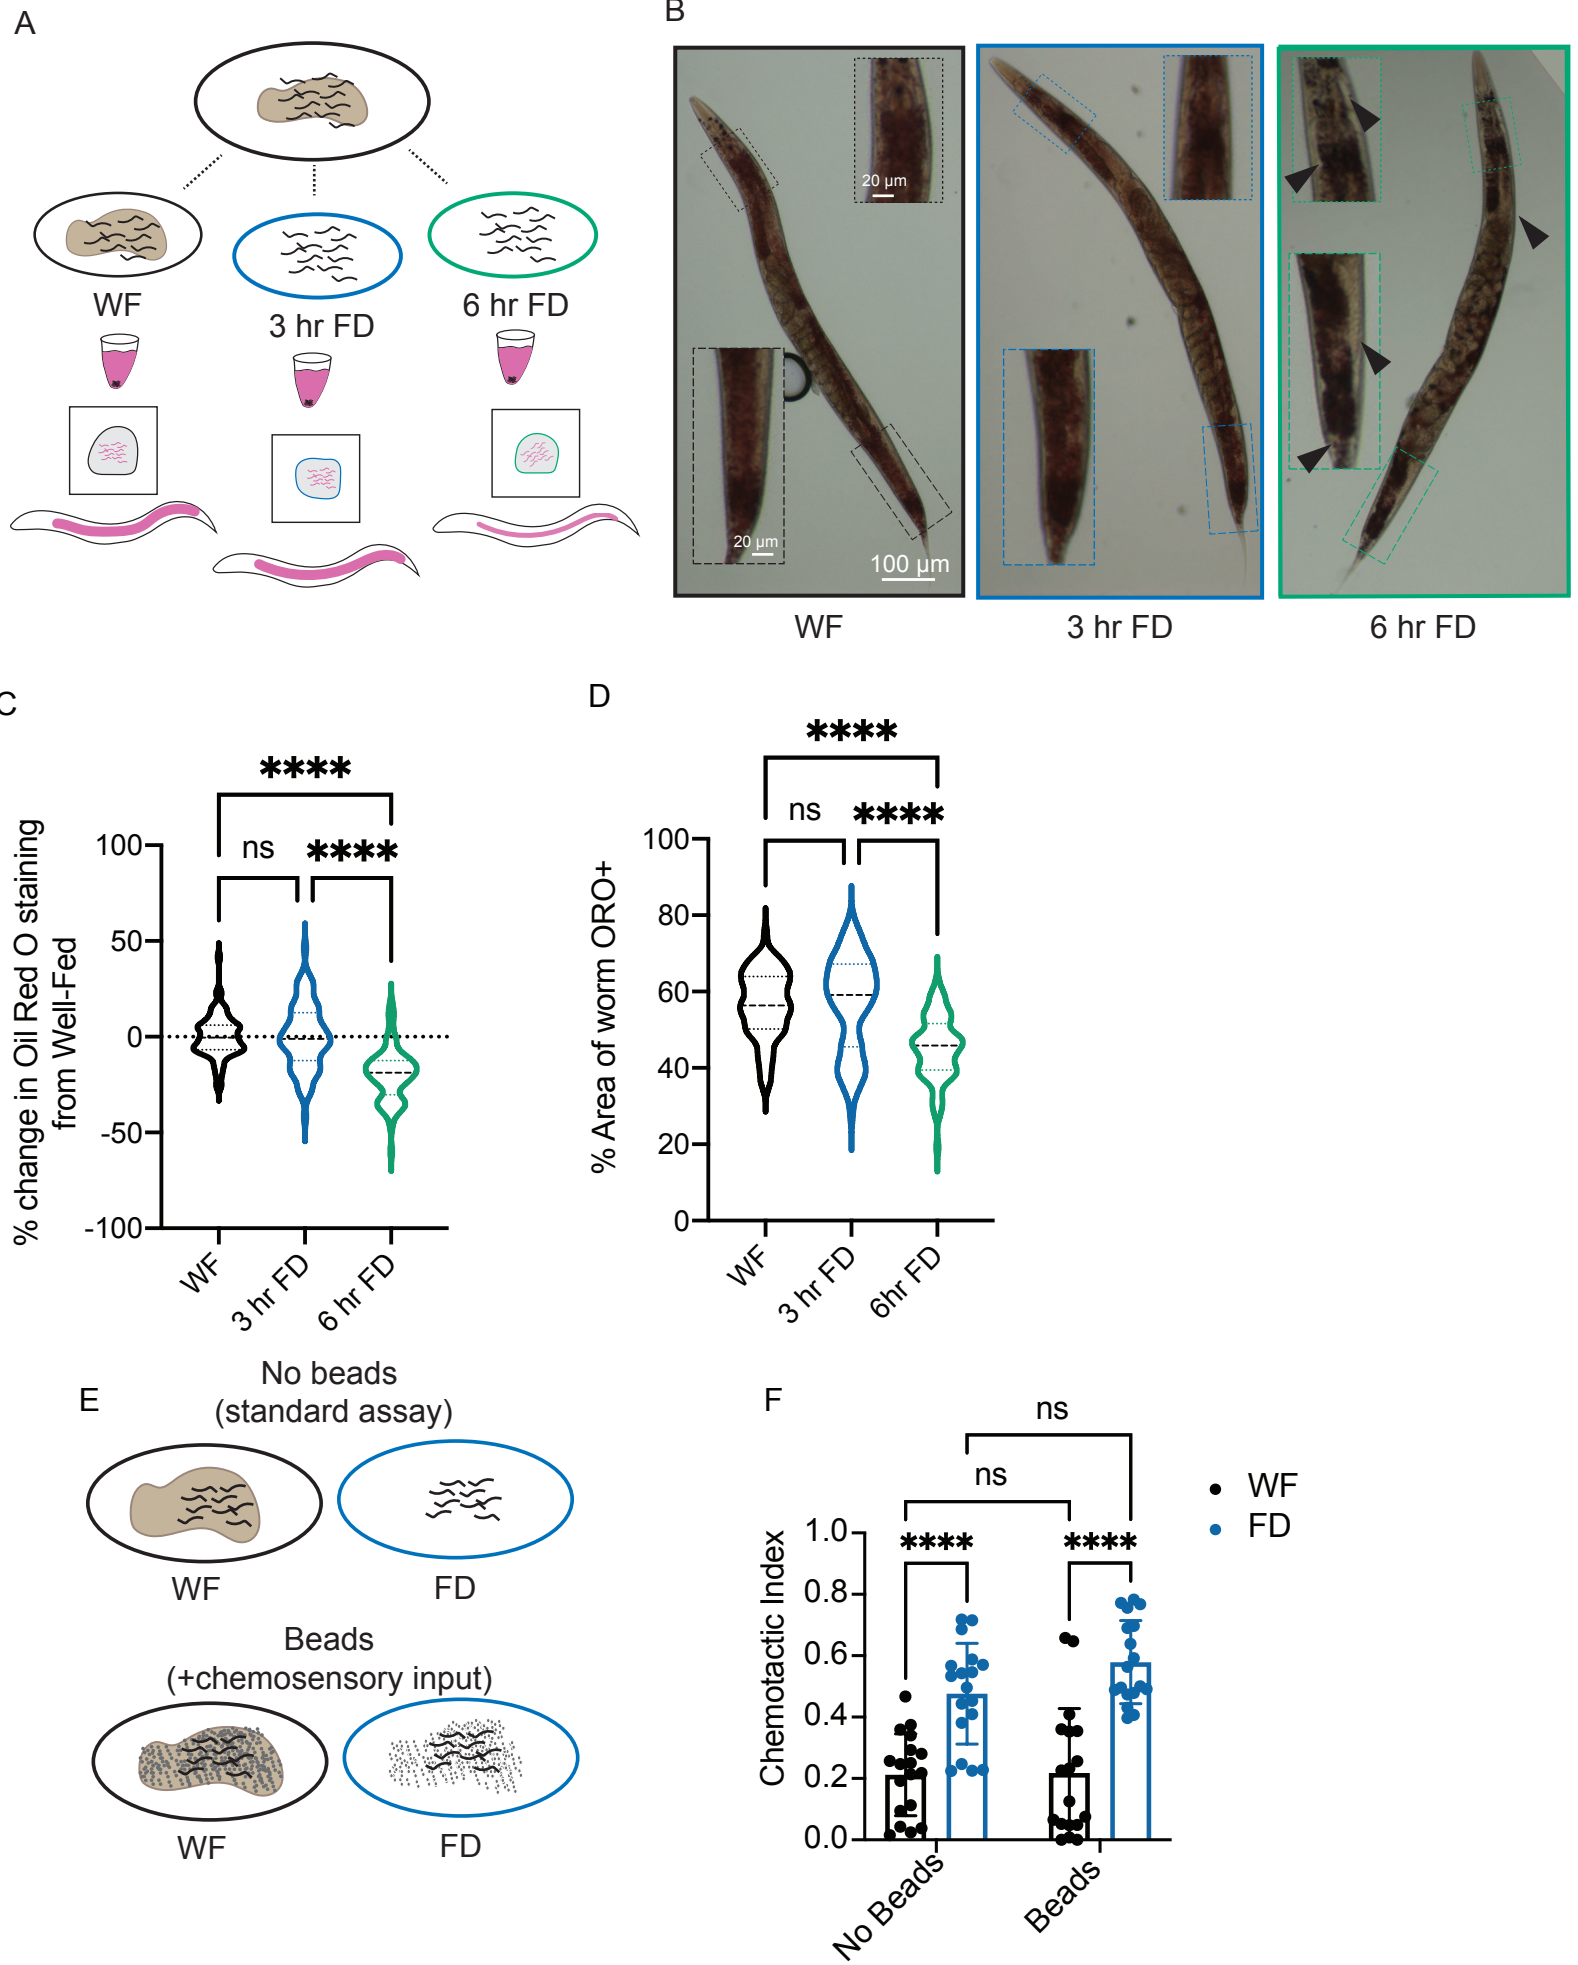

A

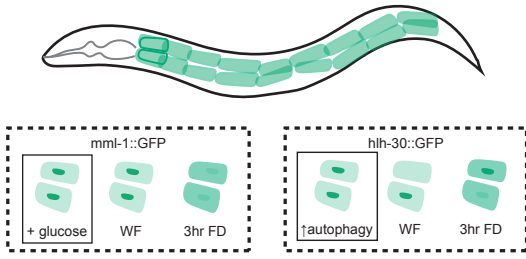

B

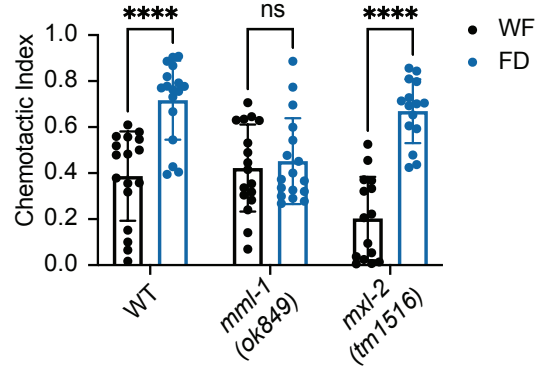

C

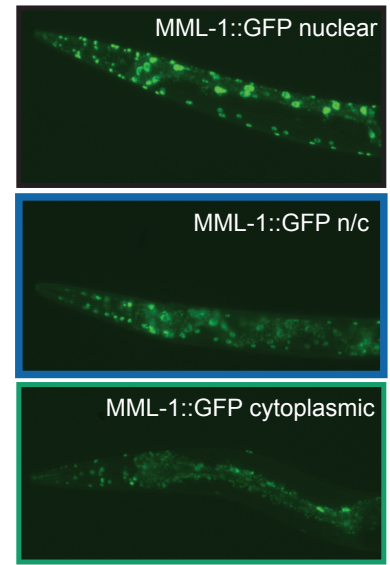

D

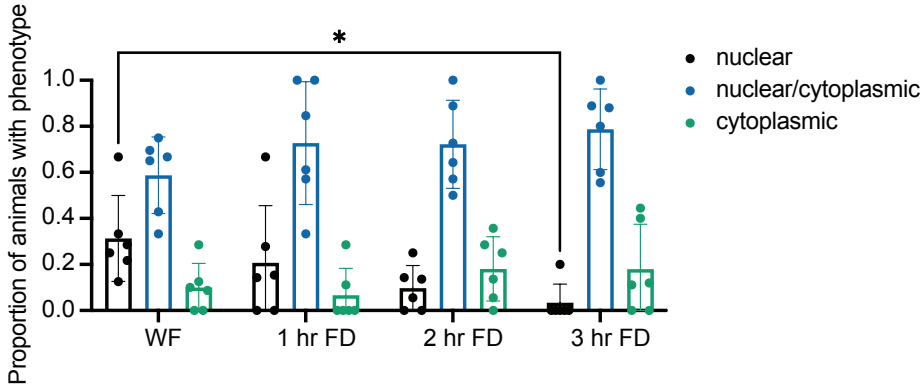

E

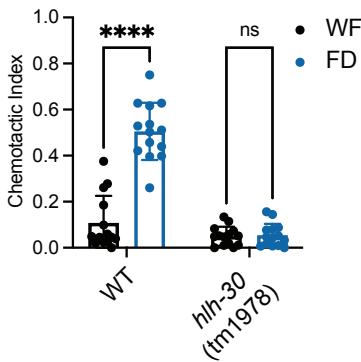

F

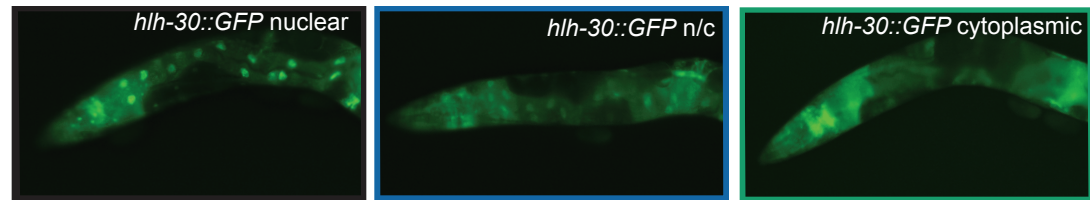

G

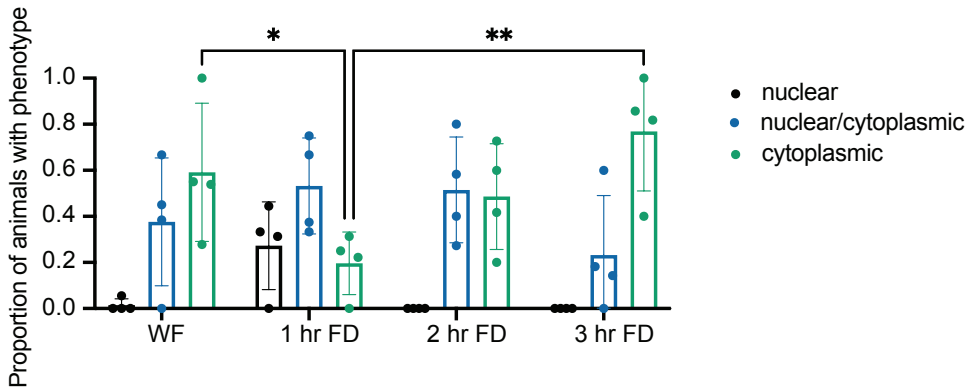

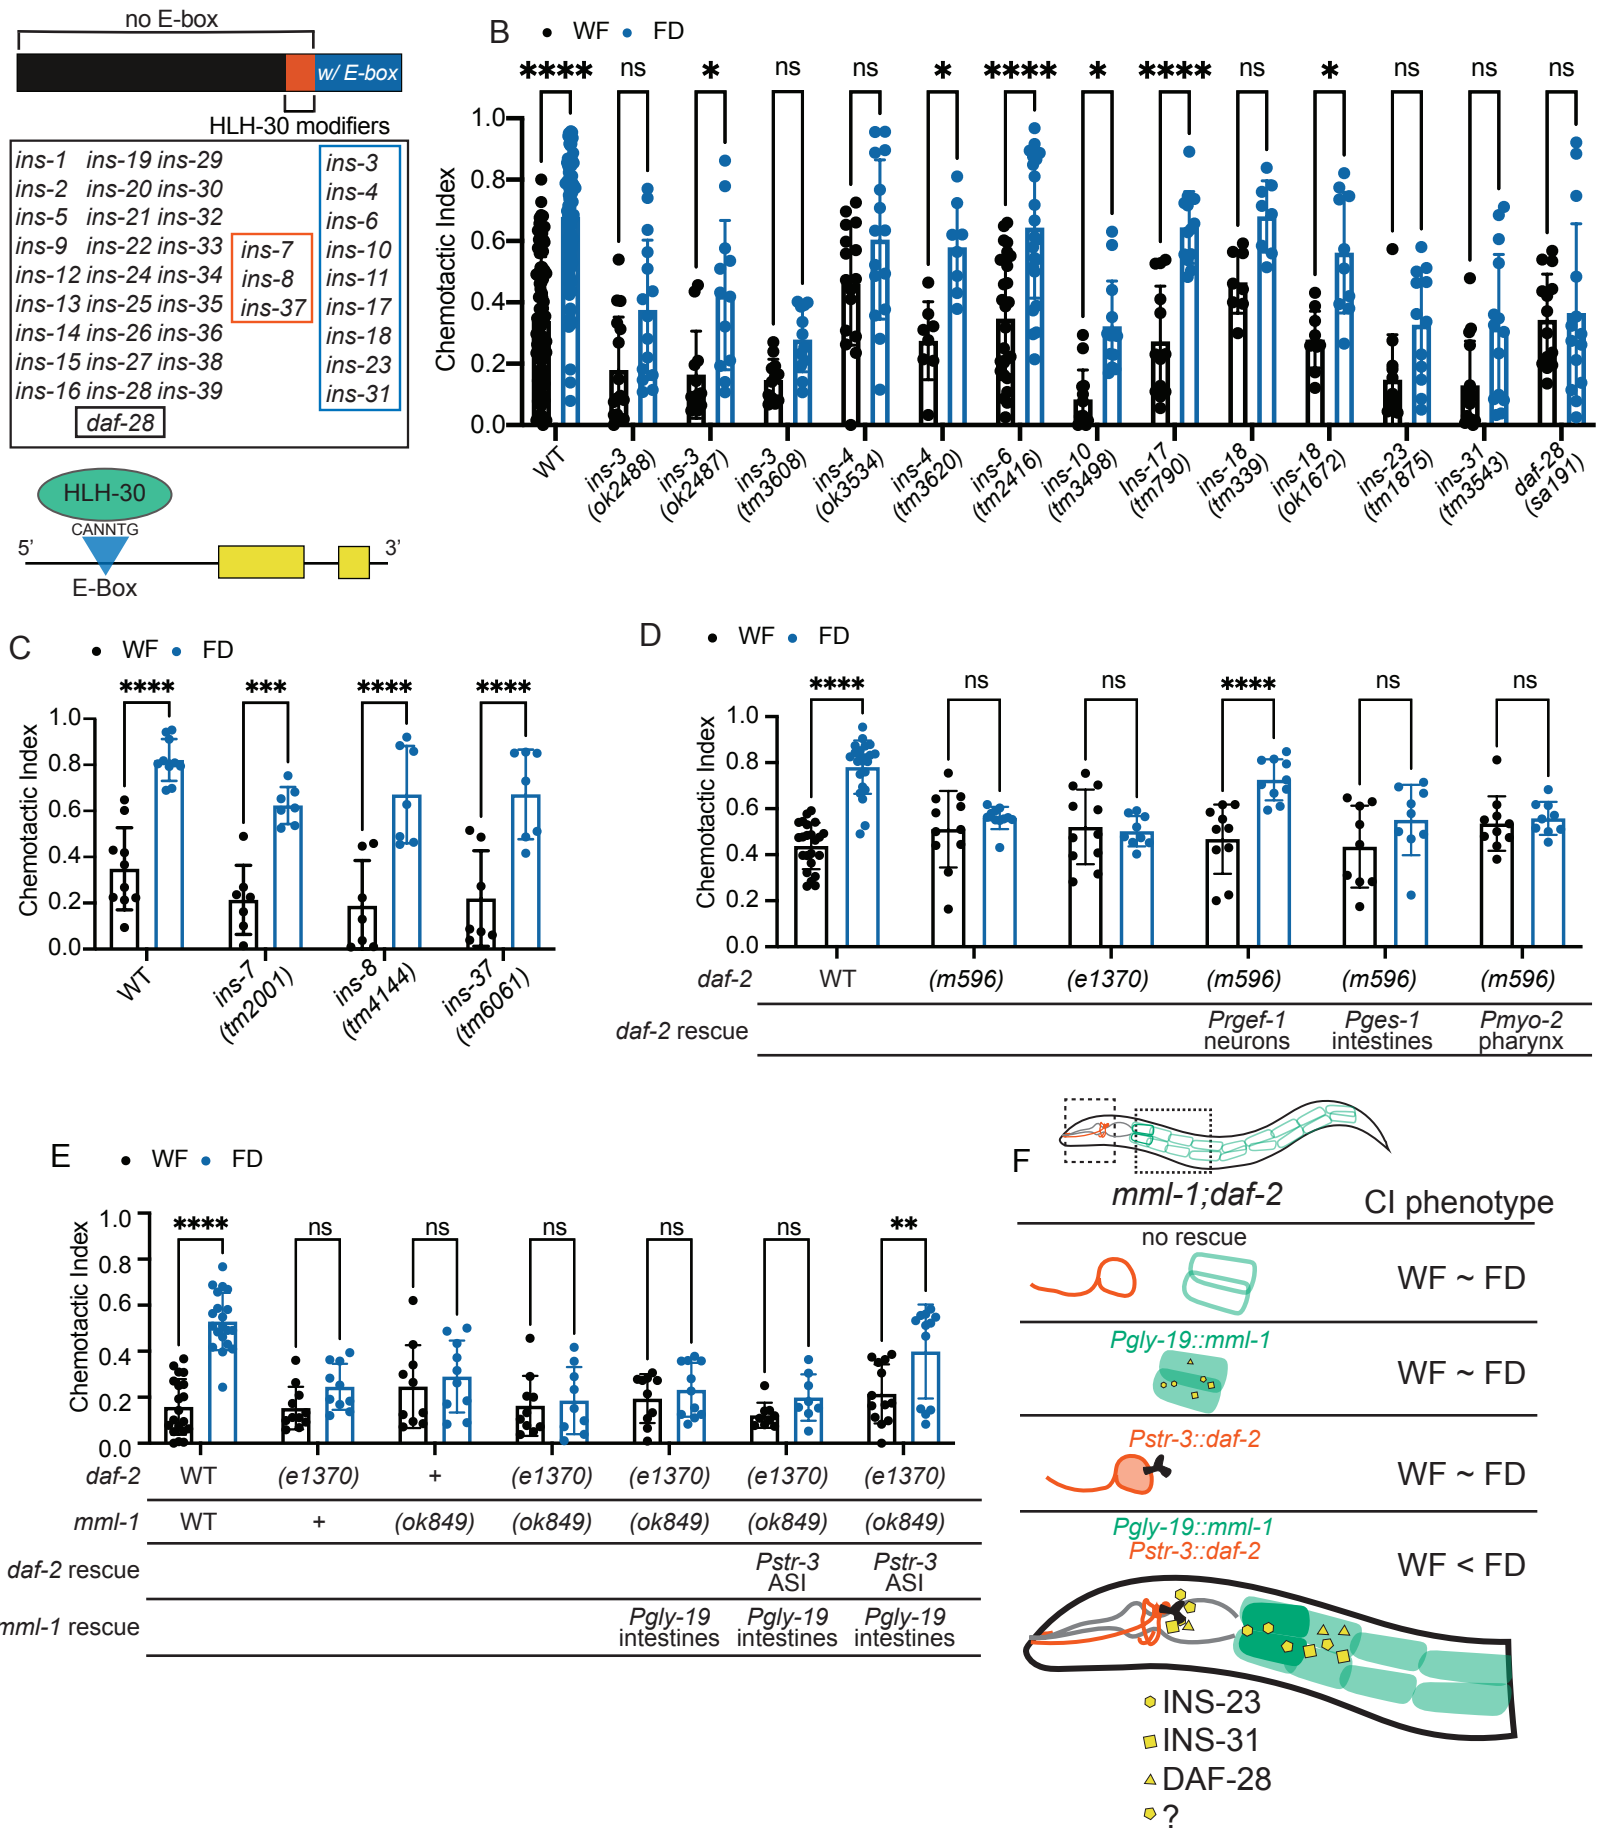

Figure 6

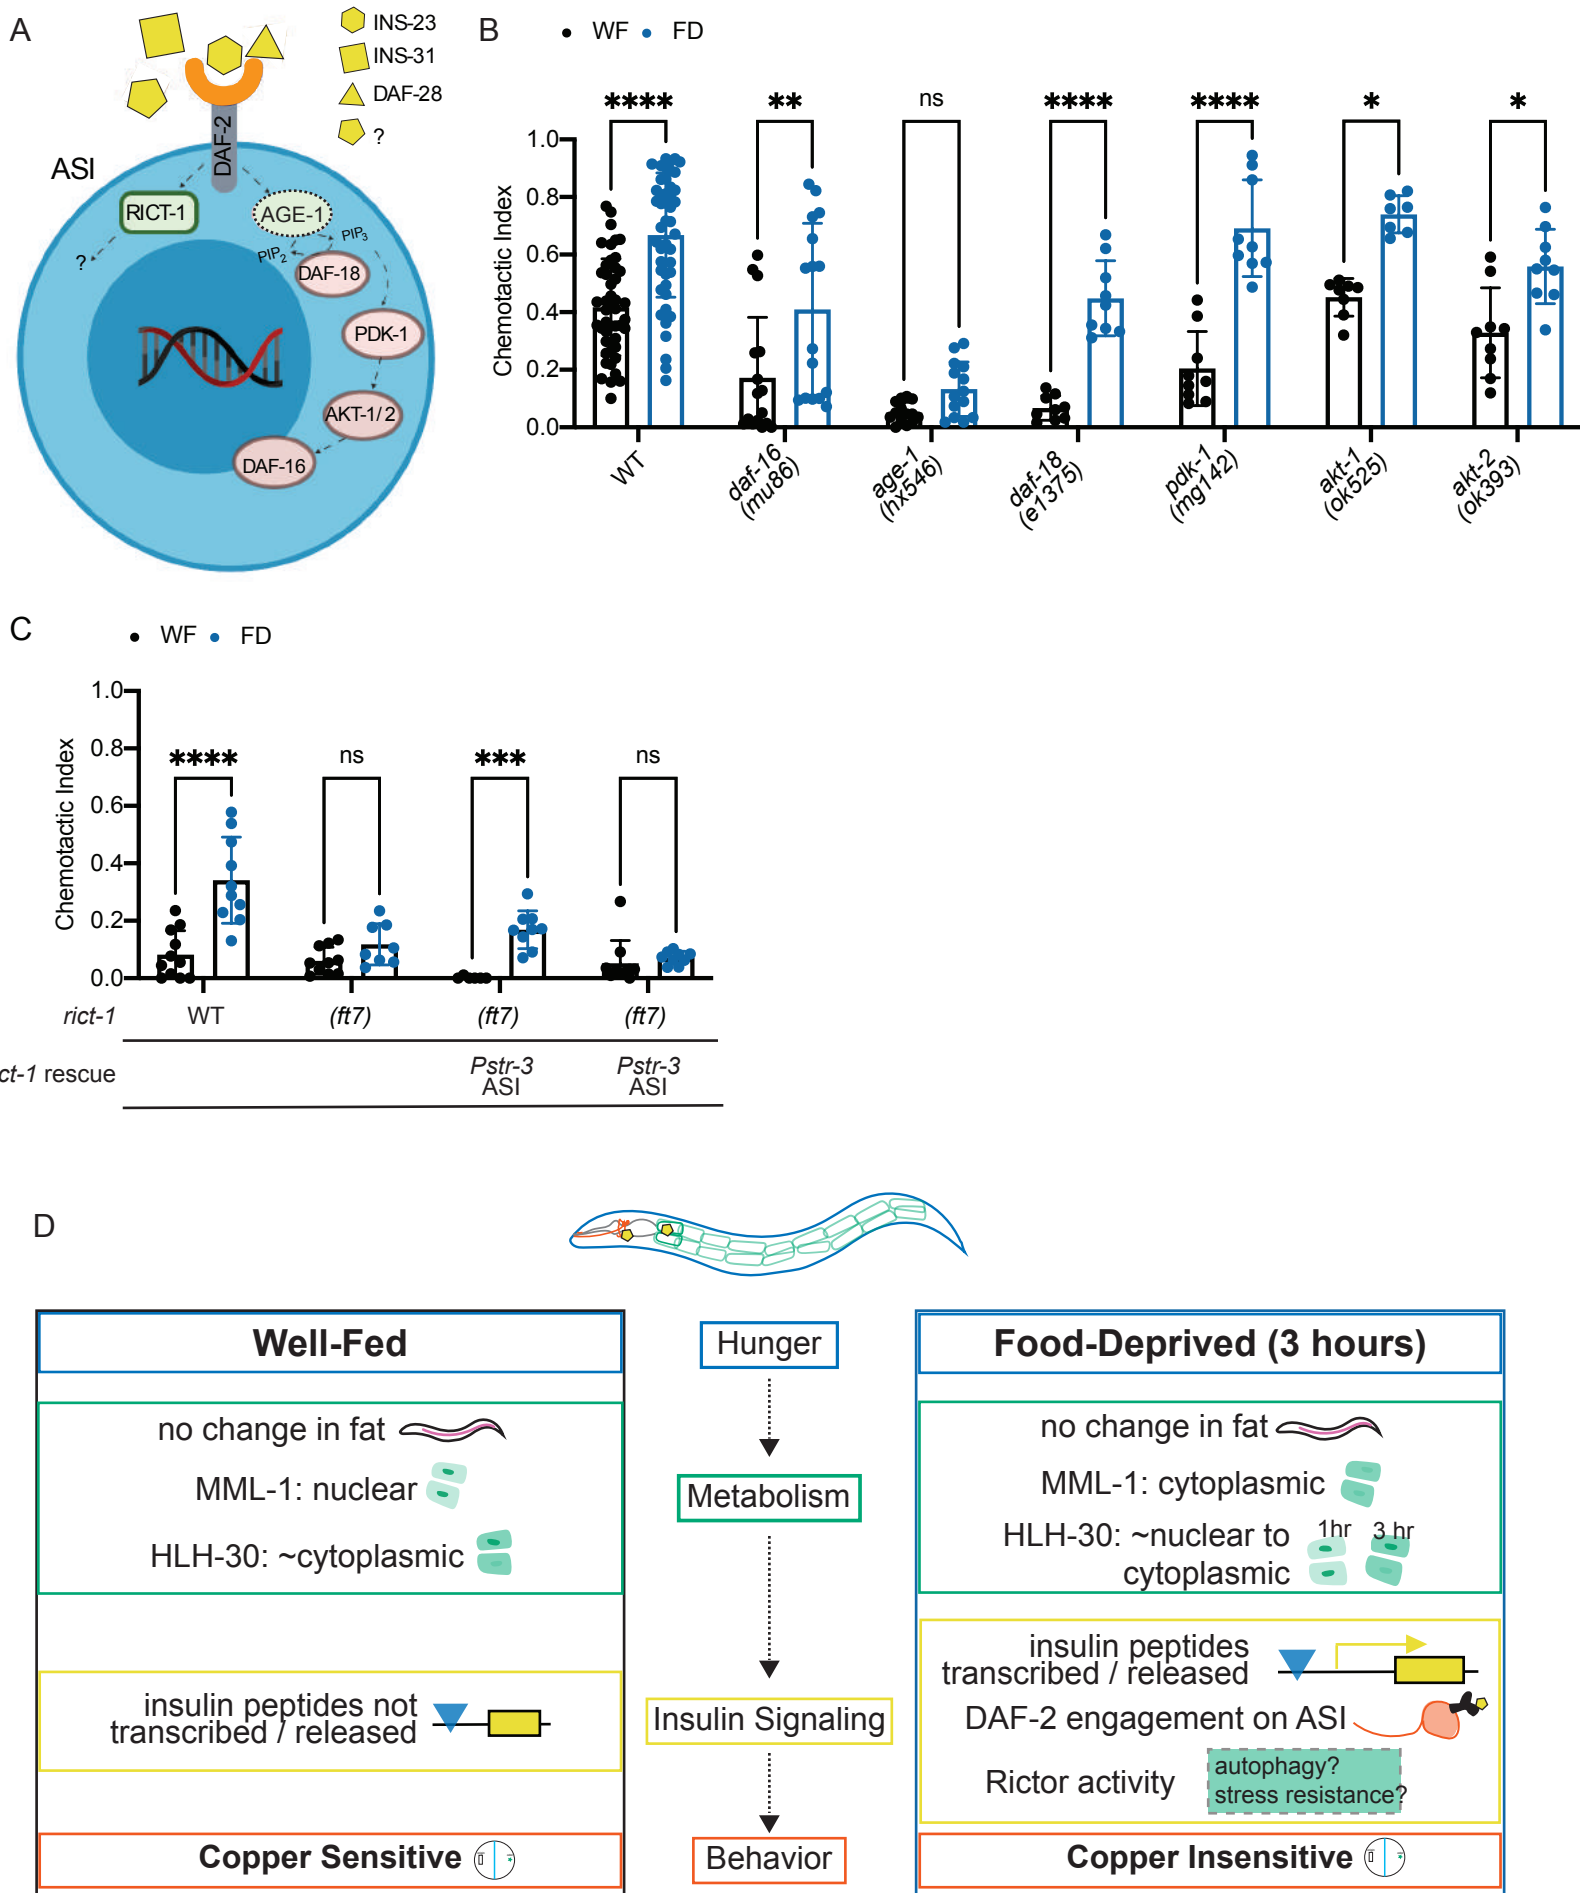

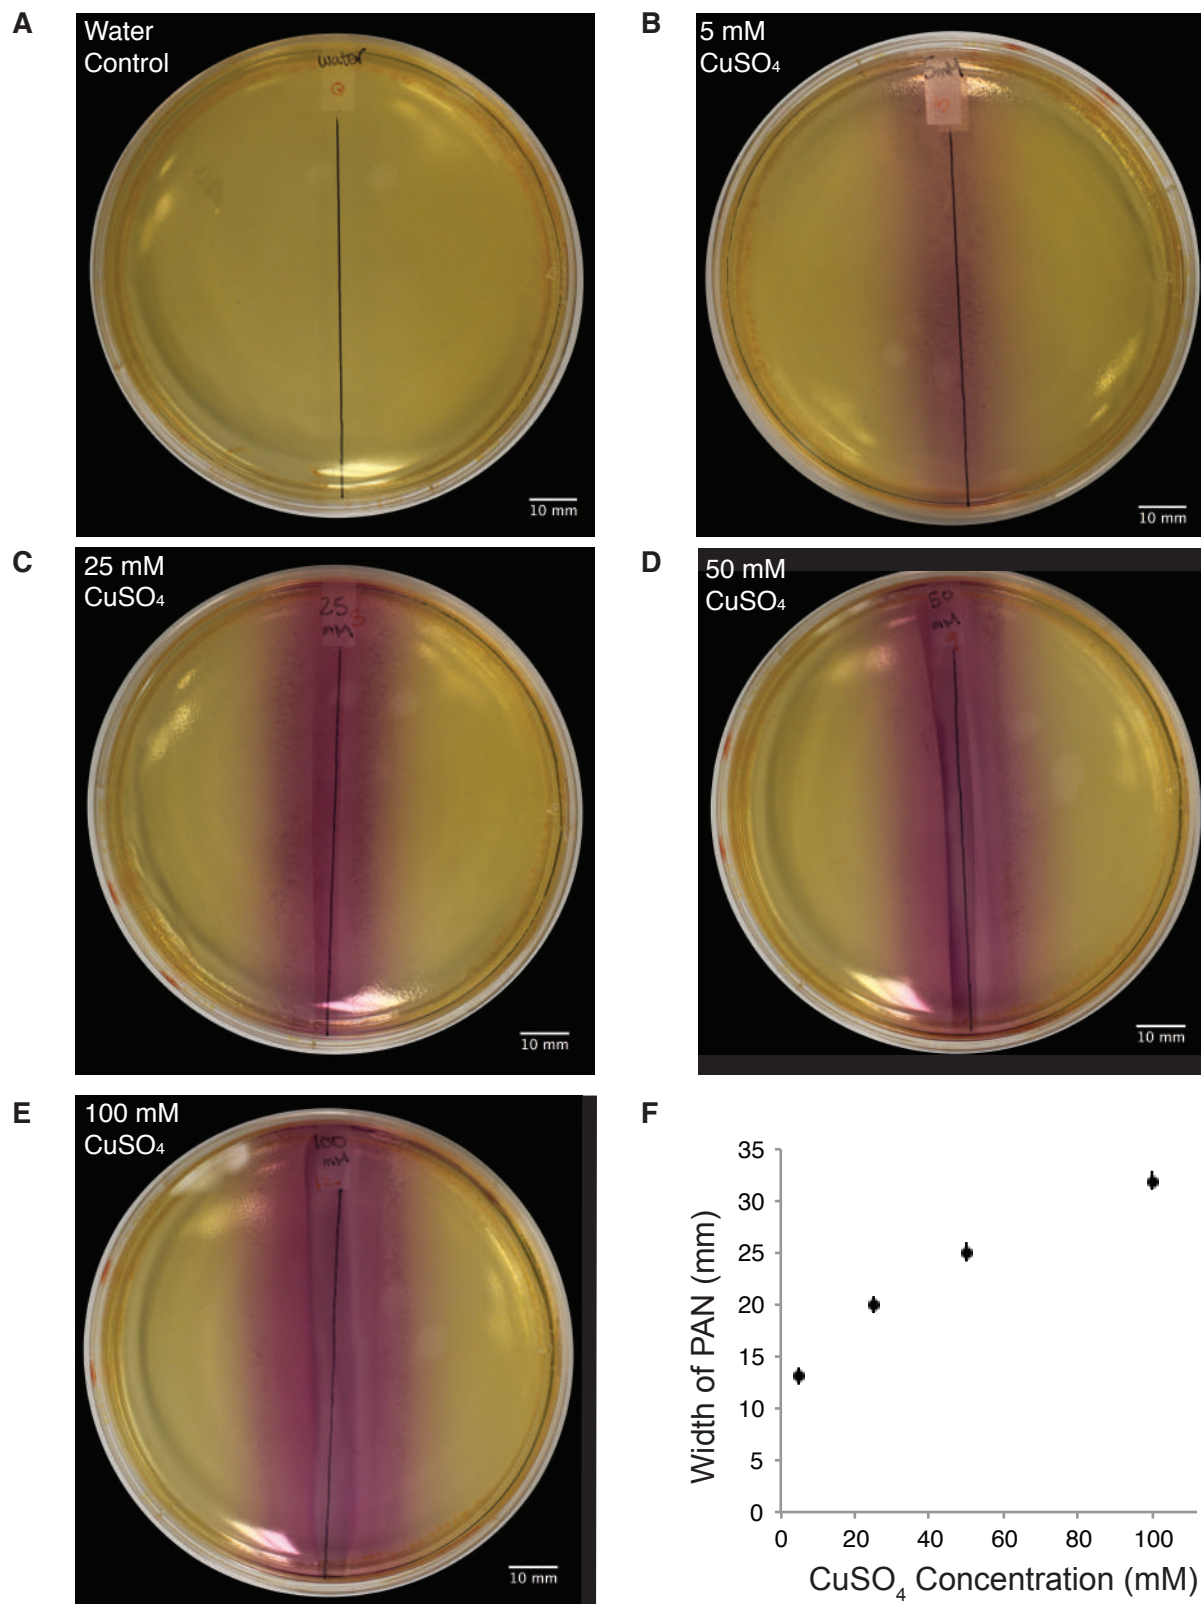

A

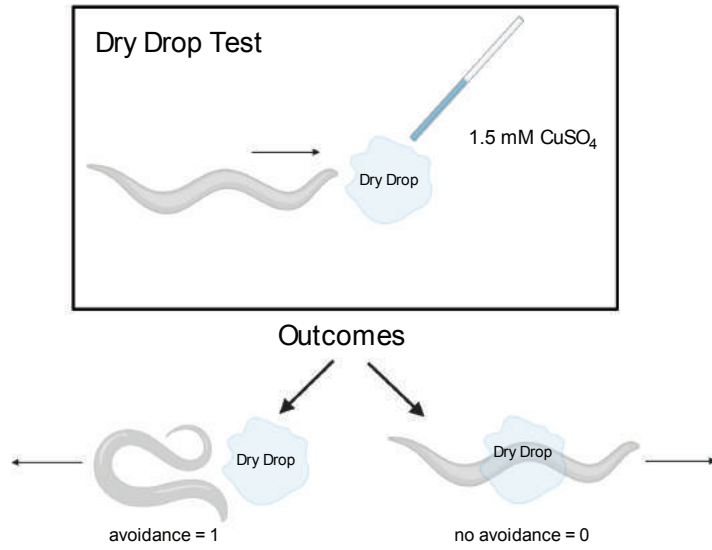

B

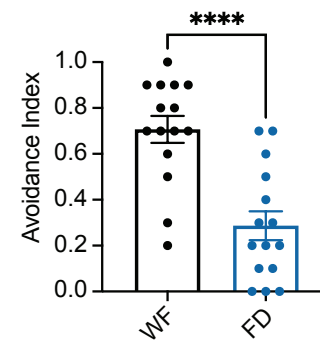

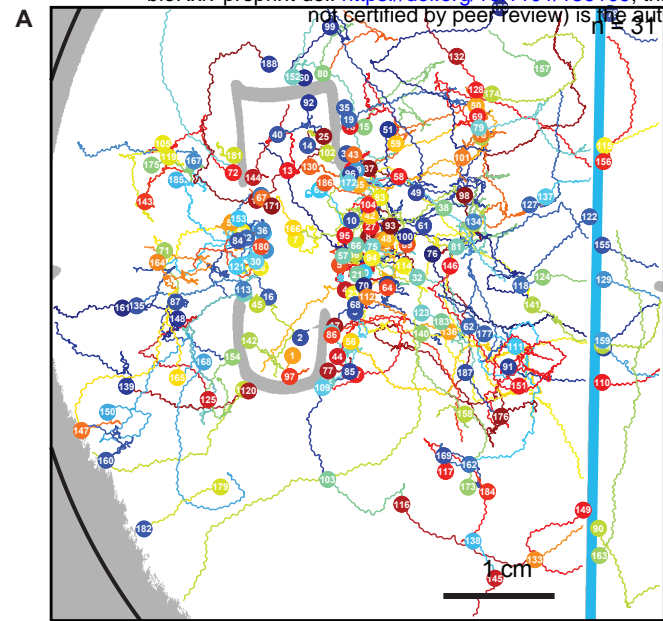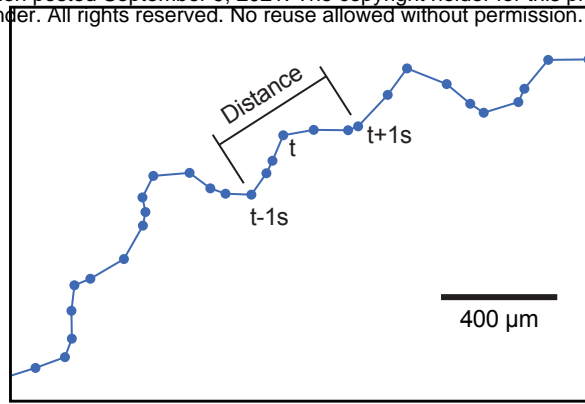

$$\text{Velocity} = \frac{\text{Euclidean Distance } (\mu\text{m})}{2 \text{ s}}$$

e.g.  $= \frac{425.7 \mu\text{m}}{2 \text{ s}} = 212.9 \mu\text{m/s}$

$$\text{Barrier Crossings} = \frac{\# \text{ Unique Tracks Across the Barrier}}{\# \text{ Unique Tracks on Plate}}$$

e.g.  $= \frac{11}{188} = 0.0585$

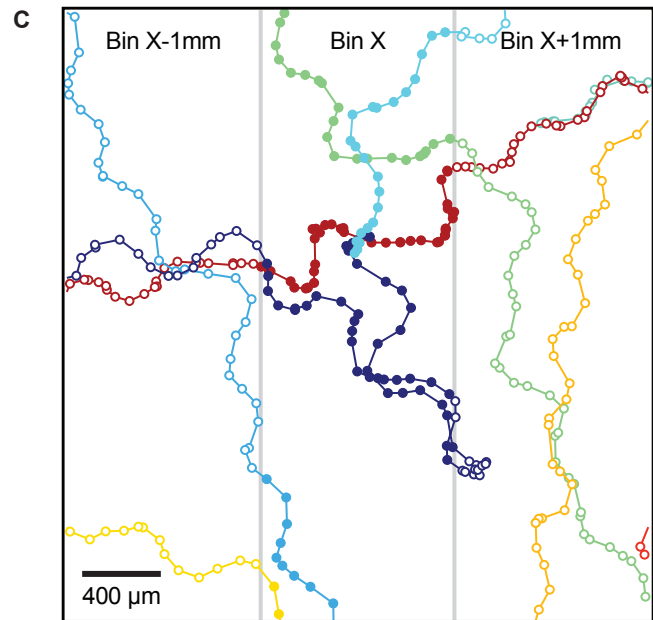

$$p(\text{Location}) = \frac{\# \text{ Tracked Points in Bin X}}{\# \text{ Total Tracked Points in All Bins}}$$

e.g.  $= \frac{139}{345} = 0.4029$

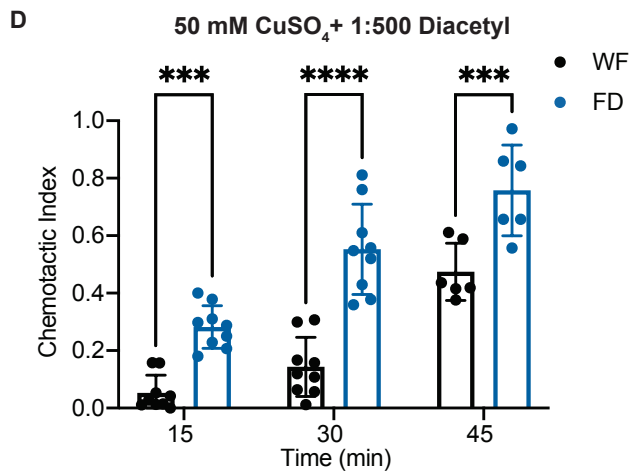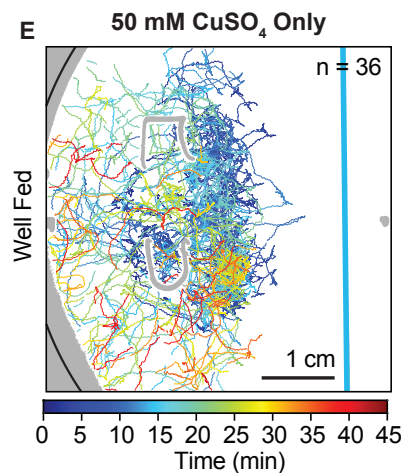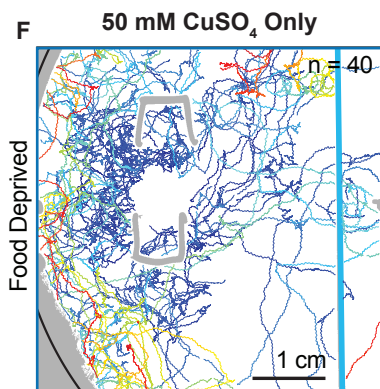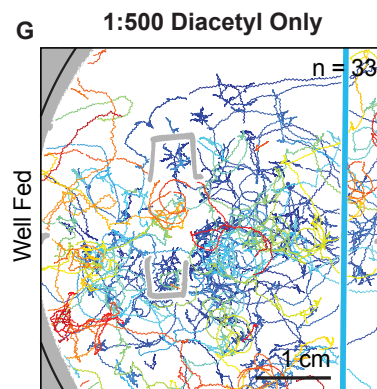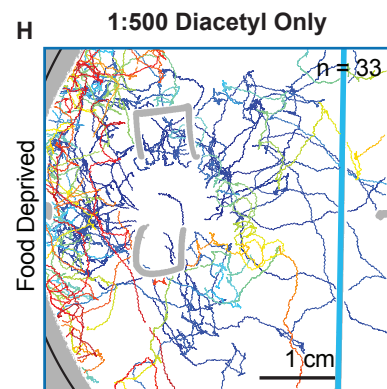

Source: https://www.biorxiv.org/content/biorxiv/early/2021/09/09/156109.full.pdf
